1

2 **Reduced expression of C/EBP $\beta$ -LIP extends health- and lifespan in mice**

3

4 Christine Müller<sup>1,2§</sup>, Laura M. Zidek<sup>2§</sup>, Tobias Ackermann<sup>1,2</sup>, Tristan de Jong<sup>1</sup>, Peng Liu<sup>3</sup>,  
5 Verena Kliche<sup>2</sup>, Mohamad Amr Zaini<sup>1,2</sup>, Gertrud Kortman<sup>1</sup>, Liesbeth Harkema<sup>4</sup>, Dineke S.  
6 Verbeek<sup>5</sup>, Jan P. Tuckermann<sup>3</sup>, Julia von Maltzahn<sup>2</sup>, Alain de Bruin<sup>4,5</sup>, Victor Guryev<sup>1</sup>, Zhao-  
7 Qi Wang<sup>2</sup> and Cornelis F. Calkhoven<sup>1,2\*</sup>

8

9 <sup>1</sup> European Research Institute for the Biology of Ageing, University Medical Centre  
10 Groningen, University of Groningen, Antonius Deusinglaan 1, NL-9700 AD Groningen, the  
11 Netherlands.

12 <sup>2</sup> Leibniz Institute on Aging - Fritz Lipmann Institute, Beutenbergstrasse 11, D-07745 Jena,  
13 Germany.

14 <sup>3</sup> Institute for Comparative Molecular Endocrinology, University of Ulm, Helmholtzstraße 8/1 D-  
15 89081 Ulm, Germany.

16 <sup>4</sup> Dutch Molecular Pathology Centre, Faculty of Veterinary Medicine, Utrecht University,  
17 Yalelaan 1, NL-3584 CL Utrecht, the Netherlands.

18 <sup>5</sup> Department of Genetics, University Medical Center Groningen, University of Groningen,  
19 Antonius Deusinglaan 1, NL-9700 RB Groningen, the Netherlands.

20

21 <sup>§</sup> These authors contributed equally to this work.

22

23

24 \* Corresponding author: [c.f.calkhoven@umcg.nl](mailto:c.f.calkhoven@umcg.nl)

## 25 **Abstract**

26 **Ageing is associated with physical decline and the development of age-related**  
27 **diseases such as metabolic disorders and cancer. Few conditions are known that**  
28 **attenuate the adverse effects of ageing, including calorie restriction (CR) and reduced**  
29 **signalling through the mechanistic target of rapamycin complex 1 (mTORC1) pathway.**  
30 **Synthesis of the metabolic transcription factor C/EBP $\beta$ -LIP is stimulated by mTORC1,**  
31 **which critically depends on a short upstream open reading frame (uORF) in the**  
32 **C/EBP $\beta$ -mRNA. Here we describe that reduced C/EBP $\beta$ -LIP expression due to genetic**  
33 **ablation of the uORF delays the development of age-associated phenotypes in mice.**  
34 **Moreover, female C/EBP $\beta^{\Delta uORF}$  mice display an extended lifespan. Since LIP levels**  
35 **increase upon aging in wt mice, our data reveal an important role for C/EBP $\beta$  in the**  
36 **aging process and suggest that restriction of LIP expression sustains health and**  
37 **fitness. Thus, therapeutic strategies targeting C/EBP $\beta$ -LIP may offer new possibilities**  
38 **to treat age-related diseases and to prolong healthspan.**

39

40

## 41 **Introduction**

42 Delaying the occurrence of age related-diseases and frailty (disabilities) and thus prolonging  
43 healthspan, would substantially increase the quality of life of the ageing population and could  
44 help to reduce healthcare costs. Calorie restriction (CR) or pharmacological inhibition of the  
45 mTORC1 pathway by rapamycin are considered as potential effective interventions to delay  
46 aging and to increase healthspan in different species (Kaeberlein, Rabinovitch, & Martin,  
47 2015). However, for humans CR is a difficult practice to maintain and may have pleiotropic  
48 effects depending on genetic constitution, environmental factors and stage of life. Likewise,  
49 the long-term use of rapamycin is limited by the risk of side effects, including disturbed  
50 glucose homeostasis, impaired wound healing, gastrointestinal discomfort and others  
51 (Augustine, Bodziak, & Hrick, 2007; de Oliveira et al., 2011; Lamming et al., 2012; Wilkinson  
52 et al., 2012). Therefore, there is a need to investigate alternative targets that are part of the  
53 CR/mTORC1 pathway that can be manipulated to reach similar beneficial effects. Our work  
54 suggests that the transcription factor C/EBP $\beta$  may provide such a target.

55 C/EBP $\beta$  regulates the expression of metabolic genes in liver and adipose tissue  
56 (Desvergne, Michalik, & Wahli, 2006; Roesler, 2001). From its mRNA three protein isoforms  
57 are synthesized through the usage of different translation initiation sites: two isoforms acting  
58 as transcriptional activators, Liver Activator Protein (LAP) -1 and -2, and a transcriptional  
59 inhibitory isoform called Liver-enriched Inhibitory Protein (LIP) (Descombes & Schibler, 1991).  
60 We showed earlier that translation into LIP depends on a *cis*-regulatory uORF (**Figure 1A**)  
61 and is stimulated by mTORC1 signalling (Calkhoven, Muller, & Leutz, 2000; Jundt et al.,  
62 2005; Zidek et al., 2015). Pharmacological or CR-induced inhibition of mTORC1 in mice  
63 selectively reduces LIP-protein synthesis and thereby increases the LAP/LIP ratio in different  
64 tissues, which is associated with metabolic improvements resembling CR (Albert & Hall,  
65 2015; Zidek et al., 2015). Recently we have developed a screening strategy for the discovery  
66 of small molecule drugs that suppress LIP expression, demonstrating that LIP expression is  
67 therapeutically targetable (Zaini et al., 2017).

68

69

## 70 **Results and discussion**

71 Others showed that LIP levels increase during aging in liver and white adipose tissue (WAT)  
72 (Hsieh et al., 1998; Karagiannides et al., 2001; Timchenko et al., 2006). Similarly, in our  
73 cohorts of wt C57BL/6 mice LIP levels are significantly higher in livers of old (20-22 months)  
74 versus young (5 months) mice, resulting in a decrease in LAP/LIP ratios during ageing  
75 (**Figure 1B, C - figure supplement 1**). In contrast, in C/EBP $\beta^{\Delta uORF}$  mice LIP levels are low  
76 and stay low in old mice. LAP levels in C/EBP $\beta^{\Delta uORF}$  males and to a lesser extent in females  
77 are increased, which is probably due to additional initiation events at the LAP-AUG by  
78 ribosomes that normally would have initiated at the uORF (Calkhoven et al., 2000). The  
79 C/EBP $\beta$ -mRNA levels are comparable at different ages and in the different genotypes (**Figure**  
80 **1D and E**). Thus, LIP levels increase with age and this increase is dependent on the uORF in  
81 the C/EBP $\beta$ -mRNA.

82 We hypothesised that the C/EBP $\beta^{\Delta uORF}$  mutation may have positive effects on  
83 healthspan and lifespan based on the CR-like metabolic improvements in C/EBP $\beta^{\Delta uORF}$  mice,  
84 including enhanced fatty acid oxidation and lack of steatosis, improved insulin sensitivity and

85 glucose tolerance and higher adiponectin levels (Zidek et al., 2015). A lifespan experiment  
86 was set up comparing C/EBP $\beta^{\Delta uORF}$  mice with wt littermates (C57BL/6) in cohorts of 50 mice  
87 of each genotype and gender. The survival curves revealed an increase in median survival of  
88 20.6% (difference in overall survival  $p=0.0014$  log-rank test,  $n=50$ ) for the female  
89 C/EBP $\beta^{\Delta uORF}$  mice compared to wt littermates (**Figure 2A**). From the 10% longest-lived  
90 females, nine out of ten were C/EBP $\beta^{\Delta uORF}$  mice (**Table supplement 1**), showing that the  
91 maximum lifespan of C/EBP $\beta^{\Delta uORF}$  females is significantly increased ( $p=0.0157$  Fisher's exact  
92 test). If maximum lifespan is determined by the mean survival of the longest-lived 10% of  
93 each cohort, C/EBP $\beta^{\Delta uORF}$  females show an increase of 9.14% ( $p$ -value= $0.00105$  Student's  $t$ -  
94 test.). For the male cohort we observed a modest increase in median survival of 5.2%,  
95 however the overall survival was not significantly increased ( $p=0.4647$  log-rank test,  $n=50$ )  
96 (**Figure 2B**). The increase in median survival of the combined cohort of C/EBP $\beta^{\Delta uORF}$  mice  
97 (males & females) was 10.5% (with a significant increase in overall survival  $p=0.0323$  log-  
98 rank test,  $n=100$ ) (**Figure supplement 2 and table supplement 1**). The observed median  
99 survival for wt females (623 days) is lower than what most other labs have reported for  
100 C57BL/6 females. We reasoned that this was due to a high incidence of ulcerative dermatitis  
101 (UD) we observed particularly in our female cohort (females: 19 mice or 38% for wt and 26  
102 mice or 52% for C/EBP $\beta^{\Delta uORF}$ ; males: 15 mice or 30% for wt and 10 mice or 20% for  
103 C/EBP $\beta^{\Delta uORF}$ ). UD is a common and spontaneous condition in mice with a C57BL/6  
104 background that progress to a severity that euthanasia is inevitable (Hampton et al.,  
105 2012). Therefore, survival curves were also calculated separately for UD-free mice and for  
106 mice that were euthanized because of serious UD (**Figure 2 C-F and table supplement 1** for  
107 complete overview). These data show that median lifespan of UD-free wt females are in a  
108 more normal range (740 days) and that the C/EBP $\beta^{\Delta uORF}$  mutation results in a significant  
109 increase of median survival specifically in females irrespective of the condition of UD.  
110 Moreover, the median survival of the C/EBP $\beta^{\Delta uORF}$  UD-free females (860.5 days) is higher  
111 compared to both wt females and wt males (829 days). The separate analysis of males with  
112 or without UD in both cases didn't show any significant difference in lifespan (**Figure 2D and**  
113 **F - figure supplement 2B and C**) similarly to the analysis of the whole cohort indicating that  
114 the C/EBP $\beta^{\Delta uORF}$  mutation increases lifespan specifically in females.

115            Similar to our study several other studies report on sex specific differences in lifespan  
116 regulation. Calorie restriction by 20% has a greater lifespan extending effect in female  
117 C57BL/6 or DBA/2J mice compared to males (Mitchell et al., 2016). In addition, prolonged  
118 treatment with the mTORC1-inhibitor rapamycin starting from midlife has lifespan extending  
119 effects that are much stronger in females than in males using genetically heterogeneous mice  
120 as well as C57BL/6 mice (Fok et al., 2014; Harrison et al., 2009; Miller et al., 2011; Y. Zhang  
121 et al., 2014). On the contrary, transient rapamycin treatment for 90 days during midlife  
122 induces extension of lifespan in males but not in females depending on the dose (Bitto et al.,  
123 2016). Moderate overexpression of the mTORC1-inhibitor TSC1 or deletion of the ribosomal  
124 S6 protein kinase 1 (S6K1), downstream of mTORC1, result in lifespan extension only in  
125 females (Selman et al., 2009; H. M. Zhang, Diaz, Walsh, & Zhang, 2017). Mutations affecting  
126 both mTORC1 and mTORC2 show ambiguous effects; lifespan extension was limited to  
127 females in mice heterozygous for mTOR and its cofactor mammalian lethal with Sec 13  
128 protein 8 (mLST8) (Lamming et al., 2012), while in a mTOR-hypomorphic mouse model  
129 lifespan is extended in both males and females (Wu et al., 2013). Notably, the reduction of  
130 LIP expression under low mTORC1 signalling is dependent on 4E-BP1/2 function and not on  
131 inhibition of S6K1 (Zidek et al., 2015). Thus, the bias towards female lifespan extension upon  
132 reduced mTORC1 signalling seems to be a common feature irrespective of whether the S6K1  
133 or 4E-BP branch is affected. Also in mouse strains with alterations in other pathways like the  
134 somatotrophic axis lifespan extension is often, but not always, more pronounced in females  
135 (Brown-Borg, 2009). Examples of somatotrophic-related female biased lifespan extension are  
136 Ames dwarf mice that are deficient in growth hormone (GH) and prolactin production (Brown-  
137 Borg, Borg, Meliska, & Bartke, 1996) and insulin-like growth factor 1 (IGF-1) receptor  
138 heterozygous mice The reason for the mostly female biased lifespan extension upon inhibition  
139 of mTORC1 signalling or in the other mentioned mouse models is not known.

140            Aging is the most important risk factor for development of cancer. A reduction in  
141 cancer incidence is recurrently observed upon CR, rapamycin-treatment or manipulation of  
142 other pathways that increase longevity in several animal models (Anisimov et al., 2011;  
143 Colman et al., 2009; Komarova et al., 2012; Mattison et al., 2012; Neff et al., 2013; Serrano,  
144 2016; Weindruch & Walford, 1982). Mice in the lifespan cohorts that died or were sacrificed

145 according to humane endpoint criteria underwent necropsy and tumours were analysed by a  
146 board certified veterinary pathologists of the Dutch Molecular Pathology Centre (DMPC). The  
147 incidence of neoplasms was markedly reduced in female C/EBP $\beta^{\Delta uORF}$  mice compared to  
148 female wt mice (68% -> 45,8%, p=0.025 Fisher's exact test) (**Figure 3A**). Furthermore,  
149 tumours were detected on necropsy at a higher age in female C/EBP $\beta^{\Delta uORF}$  mice compared to  
150 wt mice indicating a delay in tumour development (**Figure 3B**). The increase in median  
151 survival of the tumour bearing C/EBP $\beta^{\Delta uORF}$  females was 25.49% compared to that of tumour  
152 bearing wt females (p=0.0217 log-rank test) (**Figure supplement 3A**). Also the tumour load  
153 (number of different tumour types per mouse) and the tumour spread (total number of  
154 differently located tumours per mouse irrespective of the tumour type) were lower in female  
155 C/EBP $\beta^{\Delta uORF}$  mice (**Figure supplement 3B**). For males no significant reduction in tumour  
156 incidence was detected in C/EBP $\beta^{\Delta uORF}$  mice (**Figure 3C and 3D**). The survival of tumour  
157 bearing mice and the tumour load was similar in wt and C/EBP $\beta^{\Delta uORF}$  males, while the tumour  
158 spread seems to be even slightly increased in C/EBP $\beta^{\Delta uORF}$  male mice (**Figure supplement**  
159 **3C, D**). The main tumour types found in female mice were lymphoma, hepatocellular  
160 carcinoma and histiocytic sarcoma. The occurrence of all three types was reduced in  
161 C/EBP $\beta^{\Delta uORF}$  females (**Table supplement 2**). For other tumour types the single numbers are  
162 too small to make a clear statement about a change in frequency. In male mice hepatocellular  
163 carcinoma and histiocytic sarcoma were the most frequent tumour types observed. Although  
164 the overall tumour incidence was similar in C/EBP $\beta^{\Delta uORF}$  and wt males, the frequency of  
165 hepatocellular carcinoma was reduced in the C/EBP $\beta^{\Delta uORF}$  males (**Table supplement 2**).  
166 Notably, knockin mice with elevated LIP levels show an increased tumour incidence upon  
167 ageing that goes along with reduced survival compared to wt controls (Begay et al., 2015).  
168 LIP overexpression can stimulate tumour cell proliferation, migration and transformation in  
169 vitro and high LIP levels have been detected in different human tumour tissues (Anand et al.,  
170 2014; Arnal-Estape et al., 2010; Calkhoven et al., 2000; Haas et al., 2010; Jundt et al., 2005;  
171 Park et al., 2013; Raught et al., 1996; Zahnow, Younes, Laucirica, & Rosen, 1997). Taken  
172 together the studies support an oncogenic role of LIP in tumour development and suggest  
173 that the reduction of LIP in the C/EBP $\beta^{\Delta uORF}$  mice counteracts tumour development at least  
174 partially by cell intrinsic mechanisms.

175            Apart from the reduced tumour incidence and the increase in survival of tumour-  
176 bearing C/EBP $\beta^{\Delta uORF}$  females, also the survival of tumour-free female C/EBP $\beta^{\Delta uORF}$  mice was  
177 significantly extended by 25.13% ( $p=0.0467$  log-rank test) compared to wt tumour-free  
178 females (**Figure supplement 3E**). This suggests that both the tumour incidence and  
179 additional unrelated factors contribute to the increased survival of C/EBP $\beta^{\Delta uORF}$  females. The  
180 observed increase in median lifespan of tumour-free C/EBP $\beta^{\Delta uORF}$  males of 19.71% does not  
181 correlate with a statistically significant increase in the overall survival ( $p=0.4647$  log-rank test)  
182 (**Figure supplement 3F**). However, the survival curve points to a possible health  
183 improvement in the median phase of the male lifespan. Taken together, the C/EBP $\beta^{\Delta uORF}$   
184 mutation in mice restricting the expression of LIP results in a significant lifespan extension  
185 and decreased tumour incidence in females but not in males.

186            Typically, CR-mediated, genetic or pharmacological suppression of mTORC1  
187 signalling is accompanied by the attenuation of an age-associated decline of health  
188 parameters (Johnson, Rabinovitch, & Kaeberlein, 2013). We examined the selected health  
189 parameters of body weight and composition, glucose tolerance, naïve/memory T-cell ratio,  
190 motor coordination and muscle strength in separate ageing cohorts of young (3-5 months)  
191 and old (18-20 months for females and 20-22 months for males) mice. In addition, we  
192 compared the histological appearance of selected tissues (liver, muscle, pancreas, skin,  
193 spleen and bone) between old (20/22 months) wt and C/EBP $\beta^{\Delta uORF}$  mice. Body weight was  
194 significantly increased in all old mice (**Figure 4A, B**). The increase for the old female  
195 C/EBP $\beta^{\Delta uORF}$  mice was significantly smaller compared to old wt littermates, while for the  
196 males there was no significant difference between the genotypes (**Figure 4A, B**). The slightly  
197 lower body weight for the young C/EBP $\beta^{\Delta uORF}$  males was also observed in our previous study  
198 (Zidek et al., 2015). A similar pattern was observed regarding the fat content that was  
199 measured by abdominal computed tomography (CT) analysis (**Figure 4C, D**). The volumes of  
200 total fat increased strongly in old mice both in visceral and subcutaneous fat depots (**Figure**  
201 **supplement 4A, B**). Old female C/EBP $\beta^{\Delta uORF}$  mice accumulated significantly less fat in the  
202 visceral and subcutaneous fat depots than wt females, while there was no difference for male  
203 mice (**Figure supplement 4A, B**). The lean body mass was slightly lower in old female  
204 C/EBP $\beta^{\Delta uORF}$  mice and increased in male wt mice compared to young mice (**Figure**

205 **supplement 4A, B**). Thus, female C/EBP $\beta^{\Delta uORF}$  mice gain less fat upon aging similar to mice  
206 under CR or upon prolonged rapamycin treatment (Fang et al., 2013) (**Figure supplement**  
207 **4C**), which probably contributes to an improved health state upon aging and to the extension  
208 in lifespan. In contrast, although male C/EBP $\beta^{\Delta uORF}$  mice had a lower body weight and  
209 subcutaneous fat content at a young age compared to wt mice they were not able to maintain  
210 this difference during the aging process, which correlates with the lack in lifespan extension.  
211 In addition, we found an increase in mRNA expression of the macrophage marker CD68 as a  
212 measure for age-related macrophage infiltration in visceral WAT of old mice, which was  
213 attenuated in female C/EBP $\beta^{\Delta uORF}$  mice but not in male C/EBP $\beta^{\Delta uORF}$  mice (**Figure**  
214 **supplement 4D**).

215 Impaired glucose tolerance is a hallmark of the aging process, which is improved by  
216 CR (Barzilai, Banerjee, Hawkins, Chen, & Rossetti, 1998; Mitchell et al., 2016). The  
217 intraperitoneal glucose tolerance test (IPGTT) showed that glucose clearance, calculated as  
218 the area under the curve (AUC), is significantly less efficient in old wt compared to young wt  
219 mice (**Figure 4E, F**). Old C/EBP $\beta^{\Delta uORF}$  females and males perform significantly better in the  
220 IPGTT test than old wt littermates, which is reflected by the lower AUC value. Therefore, the  
221 C/EBP $\beta^{\Delta uORF}$  mutation protects against age-related decline of glucose homeostasis in males  
222 and females.

223 The ageing associated increase in memory/naïve T-cell ratio is a robust indicator for  
224 the progression of the immunological ageing progress. At a young age naïve T cells  
225 predominate and memory T cells are relatively scarce. Upon ageing the naïve T cell  
226 population is strongly reduced with a concomitant increase in the memory T cell population,  
227 resulting in an increased ratio of memory to naïve T cells (Hakim, Flomerfelt, Boyiadzis, &  
228 Gress, 2004). The ratio of memory (CD44<sup>high</sup>) to naïve (CD44<sup>low</sup>/CD62L<sup>high</sup>) cytotoxic T  
229 (CD8<sup>+</sup>) cells or memory (CD44<sup>high</sup>) to naïve (CD44<sup>low</sup>/CD62L<sup>high</sup>) helper T (CD4<sup>+</sup>) cells  
230 was analysed by flow cytometric analysis. Both increased upon aging in the blood of males  
231 and females of both genotypes (**Figure 5A-D**). However in C/EBP $\beta^{\Delta uORF}$  mice of both genders  
232 this increase was significantly attenuated compared to wt mice (**Figure 5A-D - figure**  
233 **supplement 5A-D**). These data suggest that the C/EBP $\beta^{\Delta uORF}$  mutation preserves a more  
234 juvenile immunological phenotype during ageing.



235 Aging is associated with a significant decline in motor coordination and muscle  
236 strength (Barreto, Huang, & Giffard, 2010; Demontis, Piccirillo, Goldberg, & Perrimon, 2013).  
237 In the rotarod test the time is measured that mice endure on a turning and accelerating rod as  
238 an indication for their motor-coordination. As expected, rotarod performance decreased with  
239 age both for wt female and male mice (**Figure 6A**). Remarkably, rotarod performance was  
240 completely preserved in old C/EBP $\beta^{\Delta uORF}$  females but not in C/EBP $\beta^{\Delta uORF}$  males. In the beam  
241 walking test the required crossing time and number of paw slips of mice traversing a narrow  
242 beam are measured. Old mice needed more time to cross the beam reflecting loss of motor  
243 coordination upon ageing (**Figure 6B**). The aging-associated increase of the crossing time  
244 was less severe in C/EBP $\beta^{\Delta uORF}$  males and females, although statistically significant only in  
245 males (**Figure 6B**). Nevertheless, the strong increase in the number of paw slips in old wt  
246 mice is almost completely attenuated in C/EBP $\beta^{\Delta uORF}$  males and females (**Figure 6C**). Note  
247 that the number of paw slips by young C/EBP $\beta^{\Delta uORF}$  males is already significantly lower  
248 compared to young wt males. During the wire hang test the time is measured that mice  
249 endure to hang from an elevated wire which serves as an indication for limb skeletal muscle  
250 strength (Brooks & Dunnett, 2009). Similar to the rotarod test, the decline in wire hang  
251 performance that is seen in old wt mice is completely restored for the female but not for the  
252 male C/EBP $\beta^{\Delta uORF}$  mice (**Figure 6D**).

253 Taken together these data demonstrate that the decline in motor coordination and  
254 muscle strength is less severe and partly abrogated in female C/EBP $\beta^{\Delta uORF}$  mice. The results  
255 for the old male C/EBP $\beta^{\Delta uORF}$  mice are not that clear since they show an improved  
256 performance only in the beam walking test. One possible explanation is that only the beam  
257 walking test measures purely motor coordination skills whereas the results from the rotarod  
258 and wire hang tests are influenced in addition by muscle strength and endurance. Old  
259 C/EBP $\beta^{\Delta uORF}$  males thus might have maintained their motor coordination upon ageing but still  
260 suffer from an ageing-dependent loss of muscle strength.

261 By histological examination of different tissues we observed a reduction in some age-  
262 related alterations in C/EBP $\beta^{\Delta uORF}$  mice compared to old wt controls (**Table supplement 3**).  
263 We observed a reduced severity of hepatocellular vacuolation and cytoplasmic nuclear  
264 inclusions in male C/EBP $\beta^{\Delta uORF}$  mice; in the pancreas both male and female C/EBP $\beta^{\Delta uORF}$

265 mice showed a reduced occurrence and severity of islet cell hyperplasia; in skeletal muscle  
266 the number of regenerating muscle fibres was higher in male C/EBP $\beta^{\Delta uORF}$  mice; the  
267 incidence of dermal inflammation was lower in female C/EBP $\beta^{\Delta uORF}$  mice. Unexpectedly, a  
268 slightly increased level of inflammation was detected in the livers of female C/EBP $\beta^{\Delta uORF}$   
269 mice; a condition believed to be detrimental for glucose homeostasis. However, recently this  
270 view was challenged by showing that hepatic inflammation, involving the activation of IKK $\beta$ , is  
271 beneficial for maintaining glucose homeostasis (Liu et al., 2016). The incidence of other  
272 potential age-related pathologies like focal acinar cell atrophy and inflammation in the  
273 pancreas, liver polyploidy, spleen lymphoid hyperplasia and extramedullary haematopoiesis,  
274 intramuscular adipose tissue infiltration, subcutaneous fat atrophy and bone density were not  
275 significantly altered between old wt and C/EBP $\beta^{\Delta uORF}$  mice. We found slightly reduced plasma  
276 IGF-1 levels in old C/EBP $\beta^{\Delta uORF}$  females compared to old wt females (**Table supplement 3**).  
277 A reduction in circulating IGF-1 levels was also found in mice under CR and is believed to be  
278 an important mediator of health- and lifespan extending effects of CR (Breese, Ingram, &  
279 Sonntag, 1991; Mitchell et al., 2016). Taken together our data show that multiple, but not all,  
280 ageing associated alterations are attenuated in C/EBP $\beta^{\Delta uORF}$  mice, particularly in females.

281 Finally, we performed a comparative transcriptome analysis from livers of 5 and 20  
282 months old wt and C/EBP $\beta^{\Delta uORF}$  female mice (Müller, 2018). A principal component analysis  
283 revealed that there was a clear effect of the genotype on gene expression only in the old mice  
284 suggesting that the differences in gene expression between wt and C/EBP $\beta^{\Delta uORF}$  mice are  
285 aging dependent (**Figure supplement 6**). This is supported by the finding that in young mice  
286 only 42 genes were differentially regulated between wt and C/EBP $\beta^{\Delta uORF}$  mice (FDR < 0.01;  
287 24 genes upregulated and 18 genes down-regulated in C/EBP $\beta^{\Delta uORF}$  mice compared to wt  
288 mice) while in old mice we found 152 differentially regulated genes (FDR < 0.01; 127 genes  
289 upregulated and 25 genes downregulated in C/EBP $\beta^{\Delta uORF}$  mice compared to wt mice). Gene  
290 ontology (GO) analysis using the David database (Huang da, Sherman, & Lempicki, 2009) of  
291 the genes upregulated in old C/EBP $\beta^{\Delta uORF}$  mice in comparison to old wt mice revealed GO  
292 terms including “External side of plasma membrane”, “Positive regulation of T-cell  
293 proliferation”, and “immune response” (see **Table supplement 4** for the complete list of GO-  
294 terms) whereas the GO-terms: “Acute phase” and “Extracellular space” were significantly

295 downregulated (**Table supplement 5**). Acute phase response genes are associated with  
296 inflammation and their expression in the liver increases upon ageing (Lee et al., 2012). Like in  
297 old C/EBP $\beta^{\Delta uORF}$  mice expression of acute phase response genes is also inhibited by caloric  
298 restriction or treatment with the CR mimetic metformin (Martin-Montalvo et al., 2013)  
299 suggesting similar protective mechanisms. The fact that we see the up-regulation of several  
300 GO-terms connected to lymphocyte biology fits to the increase in lymphoplasmatic  
301 inflammation in the liver of old female C/EBP $\beta^{\Delta uORF}$  mice observed by pathological analysis  
302 (**Table supplement 3**). Although it is generally believed that ageing associated lymphocyte  
303 infiltration rather promotes the ageing process by increasing inflammatory signals (Singh et  
304 al., 2008), it could also contribute to the removal of senescent or pro-tumorigenic cells,  
305 thereby acting protective (Kang et al., 2011). Despite the improved metabolic phenotype of  
306 C/EBP $\beta^{\Delta uORF}$  mice (Zidek et al., 2015), the analysis did not reveal GO-terms related to  
307 metabolism. We reasoned that metabolic genes might not be detected as differentially  
308 regulated because they are subject of expression heterogeneity in old mice. Comparison  
309 between the coefficient of variation of individual transcripts between young and old mice  
310 revealed that inter-individual variation of gene expression increases with age in both  
311 genotypes (**Figure 7A, B**) supporting earlier observations made by others (White et al.,  
312 2015). Direct comparison between old wt and C/EBP $\beta^{\Delta uORF}$  mice showed that this effect is  
313 less pronounced in C/EBP $\beta^{\Delta uORF}$  mice (**Figure 7C**). KEGG (Kyoto Encyclopedia of Genes and  
314 Genomes) pathway and GO-term enrichment analysis of the highly variably expressed genes  
315 in the aged livers revealed that in wt mice particularly metabolic genes related to fatty acid  
316 metabolism and oxidative phosphorylation were affected which was not observed in  
317 C/EBP $\beta^{\Delta uORF}$  mice (**Figure 7D - table supplement 6 and 7**). On the other hand genes  
318 involved in cell cycle, transcription and RNA biology showed higher inter-individual variation in  
319 old C/EBP $\beta^{\Delta uORF}$  mice compared to wt controls (**Table supplement 7**). These findings  
320 suggest that expression control of metabolic genes stays more robust upon aging in  
321 C/EBP $\beta^{\Delta uORF}$  mice. Whether the increased inter-individual variation of metabolic transcripts in  
322 old wt mice is a direct effect of the observed increase of the inhibitory-acting LIP isoform or is  
323 due to unknown secondary effects has to be clarified in future studies. It is however  
324 conceivable that increased transcriptional robustness in the old C/EBP $\beta^{\Delta uORF}$  mice contributes

325 to the extension in health- and lifespan of the female C/EBP $\beta^{\Delta\text{uORF}}$  mice. This idea is  
326 supported by our finding that also genes involved in ageing-associated diseases like Non-  
327 alcoholic fatty liver disease, Alzheimer's disease, Parkinson's disease, Huntington's disease  
328 and cancer (Chemical carcinogenesis) are affected by high inter-individual variation in  
329 expression levels in wt but not in C/EBP $\beta^{\Delta\text{uORF}}$  mice (**Figure 7D**).

330 In summary, reduced signalling through the mTORC1 pathway is thought to mediate  
331 many of the beneficial effects of CR or rapamycin treatment (Johnson et al., 2013), and both  
332 conditions restrict mTORC1-controlled translation into LIP (Calkhoven et al., 2000; Zidek et  
333 al., 2015). These and other studies firmly place LIP function downstream of mTORC1 at the  
334 nexus of nutrient signalling and metabolic gene regulation. However, upon ageing, LIP  
335 expression increases (the LAP/LIP ratio decreases) in the liver whereas no significant  
336 changes in mTORC1 were detected (**Figure supplement 7**). Possibly, other pathways play a  
337 role in age-related upregulation of LIP as has been described for CUGBP1 (Karagiannides et  
338 al., 2001; Timchenko et al., 2006).

339 Experimental reduction of the transcription factor C/EBP $\beta$ -LIP in mice recapitulates  
340 many of the effects of CR or treatment with rapamycin, including the reduced cancer  
341 incidence and the generally more pronounced extension of lifespan in females (**Figure 8**). We  
342 have developed a high-throughput screening strategy that allows for discovery of  
343 small molecular compounds that suppress the translation into LIP (Zaini et al., 2017). The  
344 identification of such compounds or conditions that reduce LIP translation may reveal new  
345 ways of CR-mimetic based therapeutic strategies beyond those using mTORC1 inhibition.

346

347

## 348 **Material and methods**

### 349 **Mice**

350 C/EBP $\beta^{\Delta\text{uORF}}$  mice described in (Wethmar et al., 2010) were back-crossed for 12 generations  
351 into the C57BL/6J genetic background. Mice were kept at a standard 12-h light/dark cycle at  
352 22°C in individually ventilated cages (IVC) in a specific-pathogen-free (SPF) animal facility on  
353 a standard mouse diet (Harlan Teklad 2916). Mice of the ageing cohort were analysed  
354 between 3 and 5 months of age (young) and between 18 and 20 months (old females) or

355 between 20 and 22 months (old males) and were derived from the same breeding pairs as  
356 mice used in the lifespan experiment. The body weight of the ageing cohorts was determined  
357 before the start of the experimental analysis. All of the animals were handled according to  
358 approved institutional animal care and use committee (IACUC) protocols of the Thüringer  
359 Landesamt für Verbraucherschutz (#03-005/13) and University of Groningen (#6996A).

360

### 361 **Lifespan experiment**

362 C/EBP $\beta^{\Delta uORF}$  and wt littermates (50 mice from each genotype and gender) derived from  
363 mating between heterozygous males and females were subjected to a lifespan experiment.  
364 Mice were housed in groups with maximum five female mice or four male mice per cage  
365 (separated in genotypes and genders) and did not participate in other experiments. Mice were  
366 checked daily and the lifespan of every mouse (days) was recorded. Mice were euthanized  
367 when the condition of the animal was judged as moribund and/or to be incompatible with  
368 continued survival due to severe discomfort based on the independent assessment of  
369 experienced animal caretakers. All mice that were found dead or were euthanized underwent  
370 necropsy with a few exceptions when the grade of decomposition of dead animals prevented  
371 further examination (number of mice without necropsy: n=0 for wt females; n=2 for  
372 C/EBP $\beta^{\Delta uORF}$  females; n=3 for wt males and n=5 for C/EBP $\beta^{\Delta uORF}$  males. Survival curves  
373 were calculated with the Kaplan-Meier method. Statistical significance was determined by the  
374 log-rank test using GraphPath Prism 6 software. Maximum lifespan was determined by the  
375 number of mice for each genotype that were within the 10% longest-lived mice of the  
376 combined (wt and C/EBP $\beta^{\Delta uORF}$ ) cohorts. Statistical significance of observed differences  
377 was calculated with Fisher's exact test. In addition, the mean lifespan ( $\pm$ SEM) of the 10%  
378 longest lived mice within one genotype was compared to the mean lifespan of the 10%  
379 longest lived mice of the other genotype, and the statistical significance was calculated with  
380 the Student's T-test.

381

### 382 **Tumour incidence**

383 Suspected tumour tissue found during necropsy of the lifespan cohorts was fixed in 4%  
384 paraformaldehyde and Haematoxylin & Eosin stained tissue slices were analysed by

385 experienced board-certified veterinary pathologists of the Dutch Molecular Pathology Centre  
386 (Utrecht University) to diagnose the tumour type. Tumour incidence was calculated as  
387 percentage of mice with pathologically confirmed tumours in respect to all mice from the same  
388 cohort that underwent necropsy. Tumour occurrence was defined as the time of death of an  
389 animal in which a pathologically confirmed tumour was found. Tumour load was defined as  
390 number of different tumour types found in the same mouse and tumour spread was defined  
391 as number of different organs harbouring a tumour within the same mouse irrespective of the  
392 tumour type with the exception that in those cases in which different tumour types were found  
393 in the same organ a number >1 was rated.

394

### 395 **Motor coordination experiments**

396 Rotarod test: Mice were habituated to the test situation by placing them on a rotarod (Ugo  
397 Basile) with constant rotation (5 rpm) for 5 min at two consecutive days with two trials per  
398 mouse per day separated by an interval of 30 min. In the test phase two trials per mouse  
399 were performed with accelerating rotation (2-50 rpm within 4 min) with a maximum trial  
400 duration of 5 min in which the time was measured until mice fell off the rod. Beam walking  
401 test: Mice were trained by using a beam of 3 cm width and 100 cm in length at two  
402 consecutive days (one trial per mouse per day). At the test day mice had to pass a 1 cm wide  
403 beam, 100 cm in length and beam crossing time and number off paw slips upon crossing was  
404 measured during 3 trials per mouse that were separated by an interval of 20 min. To  
405 determine of the number of mistakes the number of paw slips per trial was counted upon  
406 examination of recorded videos. Wire Hang test: To measure limb grip strength mice were  
407 placed with their four limbs at a grid with wire diameter of 1 mm at 20 cm over the layer of  
408 bedding material and the hanging time was measured until mice loosened their grip and fell  
409 down. Three trials of maximal 60s per mouse were performed that were separated by an  
410 interval of 30 min.

411

### 412 **Body composition**

413 The body composition was measured using an Aloka LaTheta Laboratory Computed  
414 Tomograph LCT-100A (Zinsser Analytic) as described in (Zidek et al., 2015). Percentage  
415 body fat was calculated in relation to the sum of lean mass and fat mass.

416

#### 417 **Bone measurements**

418 Bones of the hind legs were freed from soft tissue and fixed in 4% paraformaldehyde. For  
419 determination of the bone volume, trabecular thickness, trabecular number and trabecular  
420 separation femurs were analysed by micro CT (Skyscan 1176, Bruker) equipped with an X-  
421 ray tube (50 kV/500 mA). The resolution was 9  $\mu$ m, rotation step was set at 1°C, and a 0.5  
422 mm aluminium filter was used. For reconstruction of femora, the region of interest was  
423 defined 0.45 mm (for trabecular bone) or 4.05 mm (for cortical bone) apart from the distal  
424 growth plate into the diaphysis spanning 2.7 mm (for trabecular bone) or 1.8 mm (for cortical  
425 bone). Trabecular bone volume/tissue volume (%), trabecular number per  $\mu$ m, trabecular  
426 thickness (mm) and trabecular separation (intertrabecular distance, mm) was determined  
427 according to guidelines by ASBMR Histomorphometry Nomenclature Committee (Dempster et  
428 al., 2013).

429

#### 430 **Glucose tolerance**

431 The intraperitoneal (i.p.) glucose tolerance test (IPGTT) was performed as described in (Zidek  
432 et al., 2015). Mice without initial increase in blood glucose concentration were excluded from  
433 the analysis.

434

#### 435 **Flow cytometry**

436 Blood cells from 300  $\mu$ l blood were incubated in RBC-Lysis buffer (Biolegend) to lyse the red  
437 blood cells. Remaining cells were washed and incubated with a cocktail of fluorochrome-  
438 conjugated antibodies (CD4-PE-Cy7 (#552775) and CD62L-FITC (#561917) from BD  
439 Pharmingen; CD3e-PE (#12-0031), CD8a-eFluor 450 (#48-0081) and CD44-APC (#17-0441)  
440 from eBioscience.), incubated with propidium iodide for the detection of dead cells and  
441 analysed using the FACSCanto II analyser (BD Biosciences). The following T cell subsets  
442 were quantified: CD3<sup>+</sup>, CD8<sup>+</sup>, CD44<sup>high</sup> cytotoxic memory T cells; CD3<sup>+</sup>, CD8<sup>+</sup>, CD44<sup>low</sup>,

443 CD62L<sup>high</sup> cytotoxic naïve T cells, CD3<sup>+</sup>, CD4<sup>+</sup>, CD44<sup>high</sup> helper memory T cells and CD3<sup>+</sup>,  
444 CD4<sup>+</sup>, CD44<sup>low</sup>, CD62L<sup>high</sup> helper naïve T cells.

445

#### 446 **Histology**

447 Tissue pieces were fixed with 4% paraformaldehyde and embedded in paraffin. Sections were  
448 stained with Haematoxylin and Eosin (H&E) and age-related pathologies or tumour types  
449 were analysed by experienced board-certified veterinary pathologists of the Dutch Molecular  
450 Pathology Centre (Utrecht University). Semi-quantification of muscle regeneration was done  
451 by counting the number of myofibers with a row of internalized nuclei (>4) for five 200x fields.  
452 Other ageing-associated lesions were scored subjectively and the severity of the lesions was  
453 graded on a scale between 0 and 3 with 0 = absent; 1 = mild; 2 = moderate and 3 = severe.

454

#### 455 **Immunoblotting and quantification**

456 Mouse liver tissue was homogenized on ice with a glass douncer in RIPA buffer (150 mM  
457 NaCl, 1% NP40, 0.5% sodium deoxycholate, 0.1% SDS, 50 mM TRIS pH 8.0 supplemented  
458 with protease and phosphatase inhibitors) and sonicated. Equal amounts of total protein were  
459 separated by SDS-PAGE, transferred to a PVDF membrane and incubated with the following  
460 antibodies: C/EBP $\beta$  (E299) and  $\beta$ -actin (ab16039) from Abcam; 4E-BP1 (C-19) from Santa  
461 Cruz; phospho-p70S6K (Thr389) (108D2), p70S6K (#9202) and phospho-4E-BP1 (Thr 37/46)  
462 (#9459) from Cell Signaling Technology and HRP-linked anti rabbit IgG from GE Healthcare.  
463 Lightning Plus ECL reagent (Perkin Elmer) was used for detection and for re-probing  
464 membranes were incubated in Restore Western Blot Stripping buffer (Perbio). The detection  
465 and quantification of protein bands was performed with the Image Quant LAS 4000 Mini  
466 Imager (GE Healthcare) using the supplied software.

467

#### 468 **Quantitative real-time PCR**

469 Mouse liver or visceral fat tissue was homogenized on ice with a motor driven pellet pestle  
470 (Kontes) in the presence of QIAzol reagent (QIAGEN) and total RNA was isolated as  
471 described in (Zidek et al., 2015). cDNA synthesis was performed from 1  $\mu$ g of total RNA with  
472 the Transcriptor First Strand cDNA Synthesis Kit (Roche) using random hexamer primers.



473 qRT-was performed with the LightCycler 480 SYBR Green I Master mix (Roche) using the  
474 following primers:  $\beta$ -actin: 5'-AGA GGG AAA TCG TGC GTG AC-3' and 5'-CAA TAG TGA  
475 TGA CCT GGC CGT-3'; C/EBP $\beta$ : 5'-CTG CGG GGT TGT TGA TGT-3' and 5'-ATG CTC GAA  
476 ACG GAA AAG GT-3'; CD68: 5'-GCC CAC CAC CAC CAG TCA CG-3' and 5'- GTG GTC  
477 CAG GGT GAG GGC CA-3'.

478

#### 479 **Enzyme-linked immune-sorbent assay (ELISA)**

480 Plasma was prepared as described in (Zidek et al., 2015) and the IGF-1 specific ELISA was  
481 performed according to the instructions of the manufacturer (BioCat).

482

#### 483 **RNA-seq Analysis**

484 Liver tissue from young (5 months) and old (20 months) wt and C/EBP $\beta^{\Delta uORF}$  mice (from six  
485 individuals per group) was homogenized on ice with a motor driven pellet pestle (Kontes) in  
486 the presence of QIAzol reagent (Qiagen) and total RNA was isolated as described in Zidek et  
487 al(Zidek et al., 2015). Preparation of the sequencing libraries was performed using the  
488 TruSeq Sample Preparation V2 Kit (Illumina) according to the manufacturer's instructions.  
489 High-throughput single-end sequencing (65 bp) of the libraries was performed with an Illumina  
490 HiSeq 2500 instrument. Reads were aligned and quantified using STAR 2.5.2b(Dobin et al.,  
491 2013) against primary assembly GRCm38 using Ensembl gene build 86  
492 (<http://www.ensembl.org>). Genes with average expression level below 1 fragment per million  
493 (FPM) were excluded from the analysis. A generalized linear model was used to identify  
494 differential gene expression using EdgeR package (McCarthy, Roche, & Forde, 2012;  
495 Robinson, McCarthy, & Smyth, 2010). The library normalization was left at the standard  
496 setting (trimmed mean of M-values, TMM). The resulting p-values were corrected for multiple  
497 testing using the Benjamini-Hochberg procedure. Data visualization, calculation of CV  
498 (coefficient of variation) and statistical tests were conducted using custom R scripts (de Jong,  
499 2018). Gene ontology (GO) analysis was performed using the DAVID database version 6.8  
500 (Huang da et al., 2009) with default DAVID database setting with medium stringency and *Mus*  
501 *musculus* background. KEGG pathway analysis was performed using gProfiler tool (Reimand  
502 et al., 2016). For dataset see (Müller, 2018).

503

#### 504 **Statistical analysis**

505 Biological replication is indicated (n=x). All graphs show average  $\pm$  standard error of the mean  
506 (s.e.m.). The unpaired, two-tailed Student's t-Test was used to calculate statistical  
507 significance of results with \* p< 0.05; \*\* p<0.01; \*\*\* p< 0.001. Significance of the differences in  
508 survival curves were analysed using the log-rank test and significance of the difference in  
509 maximum lifespan (number of mice from one cohort within the 10% longest lived mice  
510 calculated from the combined cohort) and tumour incidence was calculated using the Fisher's  
511 exact test with \*p<0.05.

512

513

#### 514 **Acknowledgements**

515 We thank Rafael de Cabo, NIA Baltimore for advice with the lifespan experiment. At the  
516 ERIBA/UMCG Groningen we thank Mirjam Koster for technical assistance with histology and  
517 Gerald de Haan for critical reading of the manuscript. At the FLI we thank we thank Sabrina  
518 Eichwald for technical assistance, Lucien Frappart and Dominique Galendo for advice on  
519 necropsy, the staff of the animal house facility in particular Anja Baar and Juliane Brüchert for  
520 massive support with the lifespan experiment, Nico Andreas for advice concerning the flow  
521 cytometry experiments, Anne Gompf for technical assistance with flow cytometry, Maik  
522 Baldauf for paraffin embedding and Christina Valkova for advice with the motor coordination  
523 experiments. L.M.Z was supported by the Deutsche Forschungsgemeinschaft (DFG) through  
524 a grant to C.F.C. (CA 283/1-1) and a grant to J.V.M. (MA-3975/2-1). T.A. was supported by  
525 the Leibniz Graduate School on Ageing and Age-Related Diseases (LGSA; [www.fli-  
526 leibniz.de/phd/](http://www.fli-leibniz.de/phd/)) P.L. was supported by the Collaborative Research Centre 1149 'Trauma'  
527 (INST 40/492-1) and DFG priority program Immunobone (Tu220/6) to a grant to J.P.T.

528

529

#### 530 **Author contributions**

531 C.M., M.Z, T.A, P.L, V.K, M.A.Z, G.K, and J.M. performed experiments; L.H, A.de B.  
532 performed patho-histological analysis; T.de J, V.G. performed bioinformatic analysis; J.P.T,

533 D.V, J.von M. and Z-Q. W. designed and advised on animal experiments. C.M., L.M.Z., J. von  
534 M., V.G., Z-Q. W and C.F.C wrote the manuscript. C.F.C supervised the project.

535

536

### 537 **Competing financial interests**

538 No competing financial interest

539

540

### 541 **References**

542 Albert, V., & Hall, M. N. (2015). Reduced C/EBPbeta-LIP translation improves metabolic  
543 health. *EMBO Rep*, 16(8), 881-882. doi:10.15252/embr.201540757

544

545 Anand, S., Ebner, J., Warren, C. B., Raam, M. S., Piliang, M., Billings, S. D., & Maytin, E. V.  
546 (2014). C/EBP transcription factors in human squamous cell carcinoma: selective  
547 changes in expression of isoforms correlate with the neoplastic state. *PLoS One*,  
548 9(11), e112073. doi:10.1371/journal.pone.0112073

549

550 Anisimov, V. N., Zabezhinski, M. A., Popovich, I. G., Piskunova, T. S., Semenchenko, A. V.,  
551 Tyndyk, M. L., . . . Blagosklonny, M. V. (2011). Rapamycin increases lifespan and  
552 inhibits spontaneous tumorigenesis in inbred female mice. *Cell Cycle*, 10(24), 4230-  
553 4236. doi:10.4161/cc.10.24.18486

554

555 Arnal-Estape, A., Tarragona, M., Morales, M., Guiu, M., Nadal, C., Massague, J., & Gomis, R.  
556 R. (2010). HER2 silences tumor suppression in breast cancer cells by switching  
557 expression of C/EBPss isoforms. *Cancer Res*, 70(23), 9927-9936. doi:10.1158/0008-  
558 5472.CAN-10-0869

559

560 Augustine, J. J., Bodziak, K. A., & Hricik, D. E. (2007). Use of sirolimus in solid organ  
561 transplantation. *Drugs*, 67(3), 369-391.

562

563 Barreto, G., Huang, T. T., & Giffard, R. G. (2010). Age-related defects in sensorimotor activity,  
564 spatial learning, and memory in C57BL/6 mice. *J Neurosurg Anesthesiol*, 22(3), 214-  
565 219. doi:10.1097/ANA.0b013e3181d56c98

566

567 Barzilai, N., Banerjee, S., Hawkins, M., Chen, W., & Rossetti, L. (1998). Caloric restriction  
568 reverses hepatic insulin resistance in aging rats by decreasing visceral fat. *J Clin*  
569 *Invest*, 101(7), 1353-1361. doi:10.1172/JCI485

570

571 Begay, V., Smink, J. J., Loddenkemper, C., Zimmermann, K., Rudolph, C., Scheller, M., . . .  
572 Leutz, A. (2015). Deregulation of the endogenous C/EBPbeta LIP isoform  
573 predisposes to tumorigenesis. *J Mol Med (Berl)*, 93(1), 39-49. doi:10.1007/s00109-  
574 014-1215-5

575

576 Bitto, A., Ito, T. K., Pineda, V. V., LeTexier, N. J., Huang, H. Z., Sutlief, E., . . . Kaerberlein, M.  
577 (2016). Transient rapamycin treatment can increase lifespan and healthspan in  
578 middle-aged mice. *Elife*, 5. doi:10.7554/eLife.16351

579

580 Breese, C. R., Ingram, R. L., & Sonntag, W. E. (1991). Influence of age and long-term dietary  
581 restriction on plasma insulin-like growth factor-1 (IGF-1), IGF-1 gene expression, and  
582 IGF-1 binding proteins. *J Gerontol*, 46(5), B180-187.

583

- 584 Brooks, S. P., & Dunnett, S. B. (2009). Tests to assess motor phenotype in mice: a user's  
585 guide. *Nat Rev Neurosci*, 10(7), 519-529. doi:10.1038/nrn2652  
586
- 587 Brown-Borg, H. M. (2009). Hormonal control of aging in rodents: the somatotrophic axis. *Mol*  
588 *Cell Endocrinol*, 299(1), 64-71. doi:S0303-7207(08)00285-2 [pii]  
589 10.1016/j.mce.2008.07.001  
590
- 591 Brown-Borg, H. M., Borg, K. E., Meliska, C. J., & Bartke, A. (1996). Dwarf mice and the  
592 ageing process. *Nature*, 384(6604), 33. doi:10.1038/384033a0  
593
- 594 Calkhoven, C. F., Muller, C., & Leutz, A. (2000). Translational control of C/EBPalpha and  
595 C/EBPbeta isoform expression. *Genes Dev*, 14(15), 1920-1932.  
596
- 597 Colman, R. J., Anderson, R. M., Johnson, S. C., Kastman, E. K., Kosmatka, K. J., Beasley, T.  
598 M., . . . Weindruch, R. (2009). Caloric restriction delays disease onset and mortality in  
599 rhesus monkeys. *Science*, 325(5937), 201-204. doi:10.1126/science.1173635  
600
- 601 de Jong, T. (2018). Processed data and R script for analysis and visualization of  
602 transcriptome variability. Retrieved from  
603 [http://www.genomes.nl/CEBPB\\_delta\\_uORF/](http://www.genomes.nl/CEBPB_delta_uORF/)  
604
- 605 de Oliveira, M. A., Martins, E. M. F., Wang, Q., Sonis, S., Demetri, G., George, S., . . .  
606 Treister, N. S. (2011). Clinical presentation and management of mTOR inhibitor-  
607 associated stomatitis. *Oral Oncol*, 47(10), 998-1003.  
608 doi:10.1016/j.oraloncology.2011.08.009  
609
- 610 Demontis, F., Piccirillo, R., Goldberg, A. L., & Perrimon, N. (2013). Mechanisms of skeletal  
611 muscle aging: insights from *Drosophila* and mammalian models. *Dis Model Mech*,  
612 6(6), 1339-1352. doi:10.1242/dmm.012559  
613
- 614 Descombes, P., & Schibler, U. (1991). A liver-enriched transcriptional activator protein, LAP,  
615 and a transcriptional inhibitory protein, LIP, are translated from the same mRNA. *Cell*,  
616 67(3), 569-579. doi:0092-8674(91)90531-3 [pii]  
617
- 618 Desvergne, B., Michalik, L., & Wahli, W. (2006). Transcriptional regulation of metabolism.  
619 *Physiol Rev*, 86(2), 465-514. doi:10.1152/physrev.00025.2005  
620
- 621 Dobin, A., Davis, C. A., Schlesinger, F., Drenkow, J., Zaleski, C., Jha, S., . . . Gingeras, T. R.  
622 (2013). STAR: ultrafast universal RNA-seq aligner. *Bioinformatics*, 29(1), 15-21.  
623 doi:10.1093/bioinformatics/bts635  
624
- 625 Fang, Y., Westbrook, R., Hill, C., Boparai, R. K., Arum, O., Spong, A., . . . Bartke, A. (2013).  
626 Duration of rapamycin treatment has differential effects on metabolism in mice. *Cell*  
627 *Metab*, 17(3), 456-462. doi:10.1016/j.cmet.2013.02.008  
628
- 629 Fok, W. C., Chen, Y., Bokov, A., Zhang, Y., Salmon, A. B., Diaz, V., . . . Richardson, A.  
630 (2014). Mice fed rapamycin have an increase in lifespan associated with major  
631 changes in the liver transcriptome. *PLoS One*, 9(1), e83988.  
632 doi:10.1371/journal.pone.0083988  
633
- 634 Haas, S. C., Huber, R., Gutsch, R., Kandemir, J. D., Cappello, C., Krauter, J., . . . Brand, K.  
635 (2010). ITD- and FL-induced FLT3 signal transduction leads to increased C/EBPbeta-  
636 LIP expression and LIP/LAP ratio by different signalling modules. *Br J Haematol*,  
637 148(5), 777-790. doi:10.1111/j.1365-2141.2009.08012.x  
638
- 639 Hakim, F. T., Flomerfelt, F. A., Boyiadzis, M., & Gress, R. E. (2004). Aging, immunity and  
640 cancer. *Curr Opin Immunol*, 16(2), 151-156. doi:10.1016/j.coi.2004.01.009  
641
- 642 Hampton, A. L., Hish, G. A., Aslam, M. N., Rothman, E. D., Bergin, I. L., Patterson, K. A., . . .  
643 Rush, H. G. (2012). Progression of ulcerative dermatitis lesions in C57BL/6Crl mice

- 644 and the development of a scoring system for dermatitis lesions. *J Am Assoc Lab*  
645 *Anim Sci*, 51(5), 586-593.
- 646  
647 Harrison, D. E., Strong, R., Sharp, Z. D., Nelson, J. F., Astle, C. M., Flurkey, K., . . . Miller, R.  
648 A. (2009). Rapamycin fed late in life extends lifespan in genetically heterogeneous  
649 mice. *Nature*, 460(7253), 392-395. doi:10.1038/nature08221
- 650  
651 Hsieh, C. C., Xiong, W., Xie, Q., Rabek, J. P., Scott, S. G., An, M. R., . . . Papaconstantinou,  
652 J. (1998). Effects of age on the posttranscriptional regulation of CCAAT/enhancer  
653 binding protein alpha and CCAAT/enhancer binding protein beta isoform synthesis in  
654 control and LPS-treated livers. *Mol Biol Cell*, 9(6), 1479-1494.
- 655  
656 Huang da, W., Sherman, B. T., & Lempicki, R. A. (2009). Systematic and integrative analysis  
657 of large gene lists using DAVID bioinformatics resources. *Nat Protoc*, 4(1), 44-57.  
658 doi:10.1038/nprot.2008.211
- 659  
660 Johnson, S. C., Rabinovitch, P. S., & Kaeberlein, M. (2013). mTOR is a key modulator of  
661 ageing and age-related disease. *Nature*, 493(7432), 338-345.  
662 doi:10.1038/nature11861
- 663  
664 Jundt, F., Raetzl, N., Muller, C., Calkhoven, C. F., Kley, K., Mathas, S., . . . Dorken, B.  
665 (2005). A rapamycin derivative (everolimus) controls proliferation through down-  
666 regulation of truncated CCAAT enhancer binding protein {beta} and NF- $\kappa$ B  
667 activity in Hodgkin and anaplastic large cell lymphomas. *Blood*, 106(5), 1801-1807.  
668 doi:2004-11-4513 [pii]  
669 10.1182/blood-2004-11-4513
- 670  
671 Kaeberlein, M., Rabinovitch, P. S., & Martin, G. M. (2015). Healthy aging: The ultimate  
672 preventative medicine. *Science*, 350(6265), 1191-1193. doi:10.1126/science.aad3267
- 673  
674 Kang, T. W., Yevsa, T., Woller, N., Hoenicke, L., Wuestefeld, T., Dauch, D., . . . Zender, L.  
675 (2011). Senescence surveillance of pre-malignant hepatocytes limits liver cancer  
676 development. *Nature*, 479(7374), 547-551. doi:10.1038/nature10599
- 677  
678 Karagiannides, I., Tchkonja, T., Dobson, D. E., Steppan, C. M., Cummins, P., Chan, G., . . .  
679 Kirkland, J. L. (2001). Altered expression of C/EBP family members results in  
680 decreased adipogenesis with aging. *Am J Physiol Regul Integr Comp Physiol*, 280(6),  
681 R1772-1780.
- 682  
683 Komarova, E. A., Antoch, M. P., Novototskaya, L. R., Chernova, O. B., Paszkiewicz, G.,  
684 Leontieva, O. V., . . . Gudkov, A. V. (2012). Rapamycin extends lifespan and delays  
685 tumorigenesis in heterozygous p53<sup>+/-</sup> mice. *Aging (Albany NY)*, 4(10), 709-714.  
686 doi:10.18632/aging.100498
- 687  
688 Lamming, D. W., Ye, L., Katajisto, P., Goncalves, M. D., Saitoh, M., Stevens, D. M., . . . Baur,  
689 J. A. (2012). Rapamycin-induced insulin resistance is mediated by mTORC2 loss and  
690 uncoupled from longevity. *Science*, 335(6076), 1638-1643.  
691 doi:10.1126/science.1215135
- 692  
693 Lee, J. S., Ward, W. O., Ren, H., Vallanat, B., Darlington, G. J., Han, E. S., . . . Corton, J. C.  
694 (2012). Meta-analysis of gene expression in the mouse liver reveals biomarkers  
695 associated with inflammation increased early during aging. *Mech Ageing Dev*, 133(7),  
696 467-478. doi:10.1016/j.mad.2012.05.006
- 697  
698 Liu, J., Ibi, D., Taniguchi, K., Lee, J., Herrema, H., Akosman, B., . . . Ozcan, U. (2016).  
699 Inflammation Improves Glucose Homeostasis through IKKbeta-XBP1s Interaction.  
700 *Cell*, 167(4), 1052-1066 e1018. doi:10.1016/j.cell.2016.10.015
- 701

- 702 Martin-Montalvo, A., Mercken, E. M., Mitchell, S. J., Palacios, H. H., Mote, P. L., Scheibye-  
703 Knudsen, M., . . . de Cabo, R. (2013). Metformin improves healthspan and lifespan in  
704 mice. *Nat Commun*, 4, 2192. doi:10.1038/ncomms3192  
705
- 706 Mattison, J. A., Roth, G. S., Beasley, T. M., Tilmont, E. M., Handy, A. M., Herbert, R. L., . . .  
707 de Cabo, R. (2012). Impact of caloric restriction on health and survival in rhesus  
708 monkeys from the NIA study. *Nature*, 489(7415), 318-321. doi:10.1038/nature11432  
709
- 710 McCarthy, S. D., Roche, J. F., & Forde, N. (2012). Temporal changes in endometrial gene  
711 expression and protein localization of members of the IGF family in cattle: effects of  
712 progesterone and pregnancy. *Physiol Genomics*, 44(2), 130-140.  
713 doi:10.1152/physiolgenomics.00106.2011  
714
- 715 Miller, R. A., Harrison, D. E., Astle, C. M., Baur, J. A., Boyd, A. R., de Cabo, R., . . . Strong, R.  
716 (2011). Rapamycin, but not resveratrol or simvastatin, extends life span of genetically  
717 heterogeneous mice. *J Gerontol A Biol Sci Med Sci*, 66(2), 191-201.  
718 doi:10.1093/gerona/glq178  
719
- 720 Mitchell, S. J., Madrigal-Matute, J., Scheibye-Knudsen, M., Fang, E., Aon, M., Gonzalez-  
721 Reyes, J. A., . . . de Cabo, R. (2016). Effects of Sex, Strain, and Energy Intake on  
722 Hallmarks of Aging in Mice. *Cell Metab*, 23(6), 1093-1112.  
723 doi:10.1016/j.cmet.2016.05.027  
724
- 725 Müller, C., de Jong, T., Guryev, V., Calkhoven, CF. (2018). *Transcriptome profiling of liver*  
726 *samples of C/EBPβΔuORF mice*. Retrieved from:  
727 <https://www.ebi.ac.uk/arrayexpress/>  
728
- 729 Neff, F., Flores-Dominguez, D., Ryan, D. P., Horsch, M., Schroder, S., Adler, T., . . .  
730 Ehninger, D. (2013). Rapamycin extends murine lifespan but has limited effects on  
731 aging. *J Clin Invest*, 123(8), 3272-3291. doi:10.1172/JCI67674  
732
- 733 Park, B. H., Kook, S., Lee, S., Jeong, J. H., Brufsky, A., & Lee, B. C. (2013). An isoform of  
734 C/EBPbeta, LIP, regulates expression of the chemokine receptor CXCR4 and  
735 modulates breast cancer cell migration. *J Biol Chem*, 288(40), 28656-28667.  
736 doi:10.1074/jbc.M113.509505  
737
- 738 Raught, B., Gingras, A. C., James, A., Medina, D., Sonenberg, N., & Rosen, J. M. (1996).  
739 Expression of a translationally regulated, dominant-negative CCAAT/enhancer-  
740 binding protein beta isoform and up-regulation of the eukaryotic translation initiation  
741 factor 2alpha are correlated with neoplastic transformation of mammary epithelial  
742 cells. *Cancer Res*, 56(19), 4382-4386.  
743
- 744 Reimand, J., Arak, T., Adler, P., Kolberg, L., Reisberg, S., Peterson, H., & Vilo, J. (2016).  
745 g:Profiler-a web server for functional interpretation of gene lists (2016 update).  
746 *Nucleic Acids Res*, 44(W1), W83-89. doi:10.1093/nar/gkw199  
747
- 748 Robinson, M. D., McCarthy, D. J., & Smyth, G. K. (2010). edgeR: a Bioconductor package for  
749 differential expression analysis of digital gene expression data. *Bioinformatics*, 26(1),  
750 139-140. doi:10.1093/bioinformatics/btp616  
751
- 752 Roesler, W. J. (2001). The role of C/EBP in nutrient and hormonal regulation of gene  
753 expression. *Annu Rev Nutr*, 21, 141-165. doi:10.1146/annurev.nutr.21.1.141  
754 21/1/141 [pii]  
755
- 756 Selman, C., Tullet, J. M., Wieser, D., Irvine, E., Lingard, S. J., Choudhury, A. I., . . . Withers,  
757 D. J. (2009). Ribosomal protein S6 kinase 1 signaling regulates mammalian life span.  
758 *Science*, 326(5949), 140-144. doi:10.1126/science.1177221  
759 10.1126/science.1177221  
760

- 761 Serrano, M. (2016). Unraveling the links between cancer and aging. *Carcinogenesis*, 37(2),  
762 107. doi:10.1093/carcin/bgv100  
763
- 764 Singh, P., Coskun, Z. Z., Goode, C., Dean, A., Thompson-Snipes, L., & Darlington, G. (2008).  
765 Lymphoid neogenesis and immune infiltration in aged liver. *Hepatology*, 47(5), 1680-  
766 1690. doi:10.1002/hep.22224  
767
- 768 Timchenko, L. T., Salisbury, E., Wang, G. L., Nguyen, H., Albrecht, J. H., Hershey, J. W., &  
769 Timchenko, N. A. (2006). Age-specific CUGBP1-eIF2 complex increases translation  
770 of CCAAT/enhancer-binding protein beta in old liver. *J Biol Chem*, 281(43), 32806-  
771 32819. doi:10.1074/jbc.M605701200  
772
- 773 Weindruch, R., & Walford, R. L. (1982). Dietary restriction in mice beginning at 1 year of age:  
774 effect on life-span and spontaneous cancer incidence. *Science*, 215(4538), 1415-  
775 1418.  
776
- 777 Wethmar, K., Begay, V., Smink, J. J., Zaragoza, K., Wiesenthal, V., Dorken, B., . . . Leutz, A.  
778 (2010). C/EBPbetaDeltaORF mice--a genetic model for uORF-mediated  
779 translational control in mammals. *Genes Dev*, 24(1), 15-20. doi:24/1/15 [pii]  
780 10.1101/gad.557910  
781
- 782 White, R. R., Milholland, B., MacRae, S. L., Lin, M., Zheng, D., & Vijg, J. (2015).  
783 Comprehensive transcriptional landscape of aging mouse liver. *BMC Genomics*, 16,  
784 899. doi:10.1186/s12864-015-2061-8  
785
- 786 Wilkinson, J. E., Burmeister, L., Brooks, S. V., Chan, C. C., Friedline, S., Harrison, D. E., . . .  
787 Miller, R. A. (2012). Rapamycin slows aging in mice. *Aging Cell*, 11(4), 675-682.  
788 doi:10.1111/j.1474-9726.2012.00832.x  
789
- 790 Wu, J. J., Liu, J., Chen, E. B., Wang, J. J., Cao, L., Narayan, N., . . . Finkel, T. (2013).  
791 Increased Mammalian Lifespan and a Segmental and Tissue-Specific Slowing of  
792 Aging after Genetic Reduction of mTOR Expression. *Cell Rep*, 4(5), 913-920.  
793 doi:10.1016/j.celrep.2013.07.030  
794
- 795 Zahnow, C. A., Younes, P., Laucirica, R., & Rosen, J. M. (1997). Overexpression of  
796 C/EBPbeta-LIP, a naturally occurring, dominant-negative transcription factor, in  
797 human breast cancer. *J Natl Cancer Inst*, 89(24), 1887-1891.  
798
- 799 Zaini, M. A., Muller, C., Ackermann, T., Reinshagen, J., Kortman, G., Pless, O., & Calkhoven,  
800 C. F. (2017). A screening strategy for the discovery of drugs that reduce C/EBPbeta-  
801 LIP translation with potential calorie restriction mimetic properties. *Sci Rep*, 7, 42603.  
802 doi:10.1038/srep42603  
803
- 804 Zhang, H. M., Diaz, V., Walsh, M. E., & Zhang, Y. (2017). Moderate lifelong overexpression of  
805 tuberous sclerosis complex 1 (TSC1) improves health and survival in mice. *Sci Rep*,  
806 7(1), 834. doi:10.1038/s41598-017-00970-7  
807
- 808 Zhang, Y., Bokov, A., Gelfond, J., Soto, V., Ikeno, Y., Hubbard, G., . . . Fischer, K. (2014).  
809 Rapamycin extends life and health in C57BL/6 mice. *J Gerontol A Biol Sci Med Sci*,  
810 69(2), 119-130. doi:10.1093/gerona/glt056  
811
- 812 Zidek, L. M., Ackermann, T., Hartleben, G., Eichwald, S., Kortman, G., Kiehnopf, M., . . .  
813 Calkhoven, C. F. (2015). Deficiency in mTORC1-controlled C/EBPbeta-mRNA  
814 translation improves metabolic health in mice. *EMBO Rep*, 16(8), 1022-1036.  
815 doi:10.15252/embr.201439837  
816  
817

Figure 1

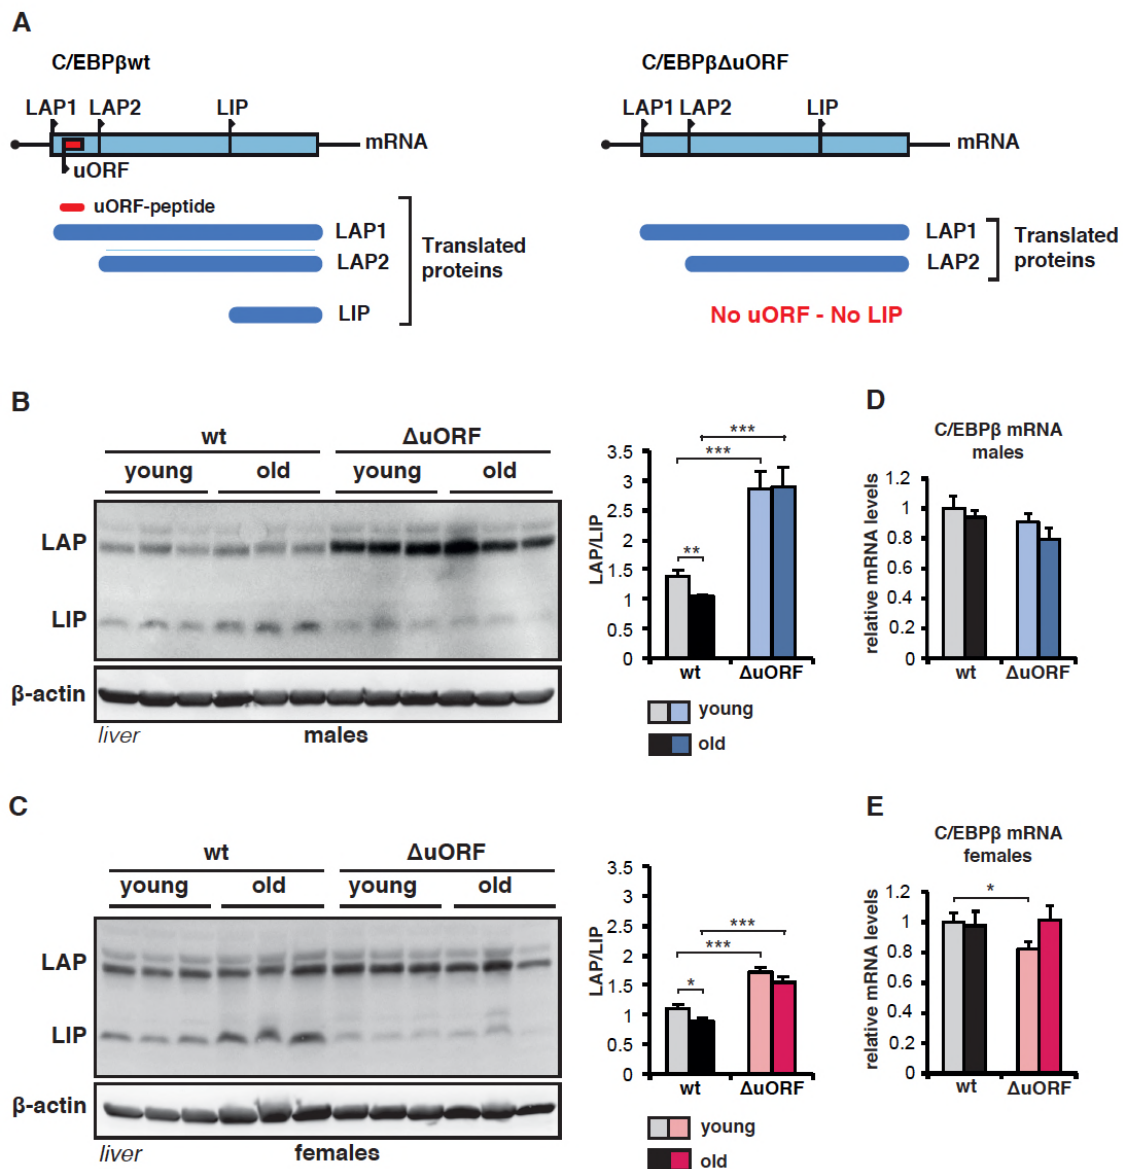

818 **Figure 1.** C/EBP $\beta$  LAP/LIP isoform ratio increases upon ageing. (A) The graph at the left  
819 shows that wt C/EBP $\beta$ -mRNA is translated into LAP1 and LAP2 through regular translation  
820 initiation, while translation into LIP involves a primary translation of the uORF followed by  
821 translation re-initiation at the downstream LIP-AUG by post-uORF-translation ribosomes. The  
822 graph at the right shows that genetic ablation of the uORF abolishes translation into LIP, but  
823 leaves translation into LAP1 and LAP2 unaffected (for detailed description see(Calkhoven et  
824 al., 2000; Zidek et al., 2015). (B and C) Immunoblots of liver samples from young (5 months)  
825 and old (female 20 months, male 22 months) wt and C/EBP $\beta^{\Delta uORF}$  (B) males and (C) females  
826 showing LAP and LIP isoform expression.  $\beta$ -actin expression served as loading control. The  
827 LAP/LIP isoform ratio as calculated from quantification by chemiluminescence digital imaging  
828 of immunoblots is shown at the right (wt males n=9 young, n=10 old; C/EBP $\beta^{\Delta uORF}$  males,  
829 n=11 young, n=10 old; wt females, n=9 wt young, n=8 old; C/EBP $\beta^{\Delta uORF}$  females, n=10  
830 young, n=10 old). (D) C/EBP $\beta$  mRNA levels in males as determined by quantitative real-time  
831 PCR (wt, n=11 young, n=11 old; C/EBP $\beta^{\Delta uORF}$ , n=11 young, n=9 old) and (E) in females (wt,  
832 n=9 young, n=11 old; C/EBP $\beta^{\Delta uORF}$ , n=9 young, n=11 old). P-values were determined by  
833 Student's t-test, \*p<0.05; \*\*p<0.01; \*\*\*p<0.001.



Figure 2

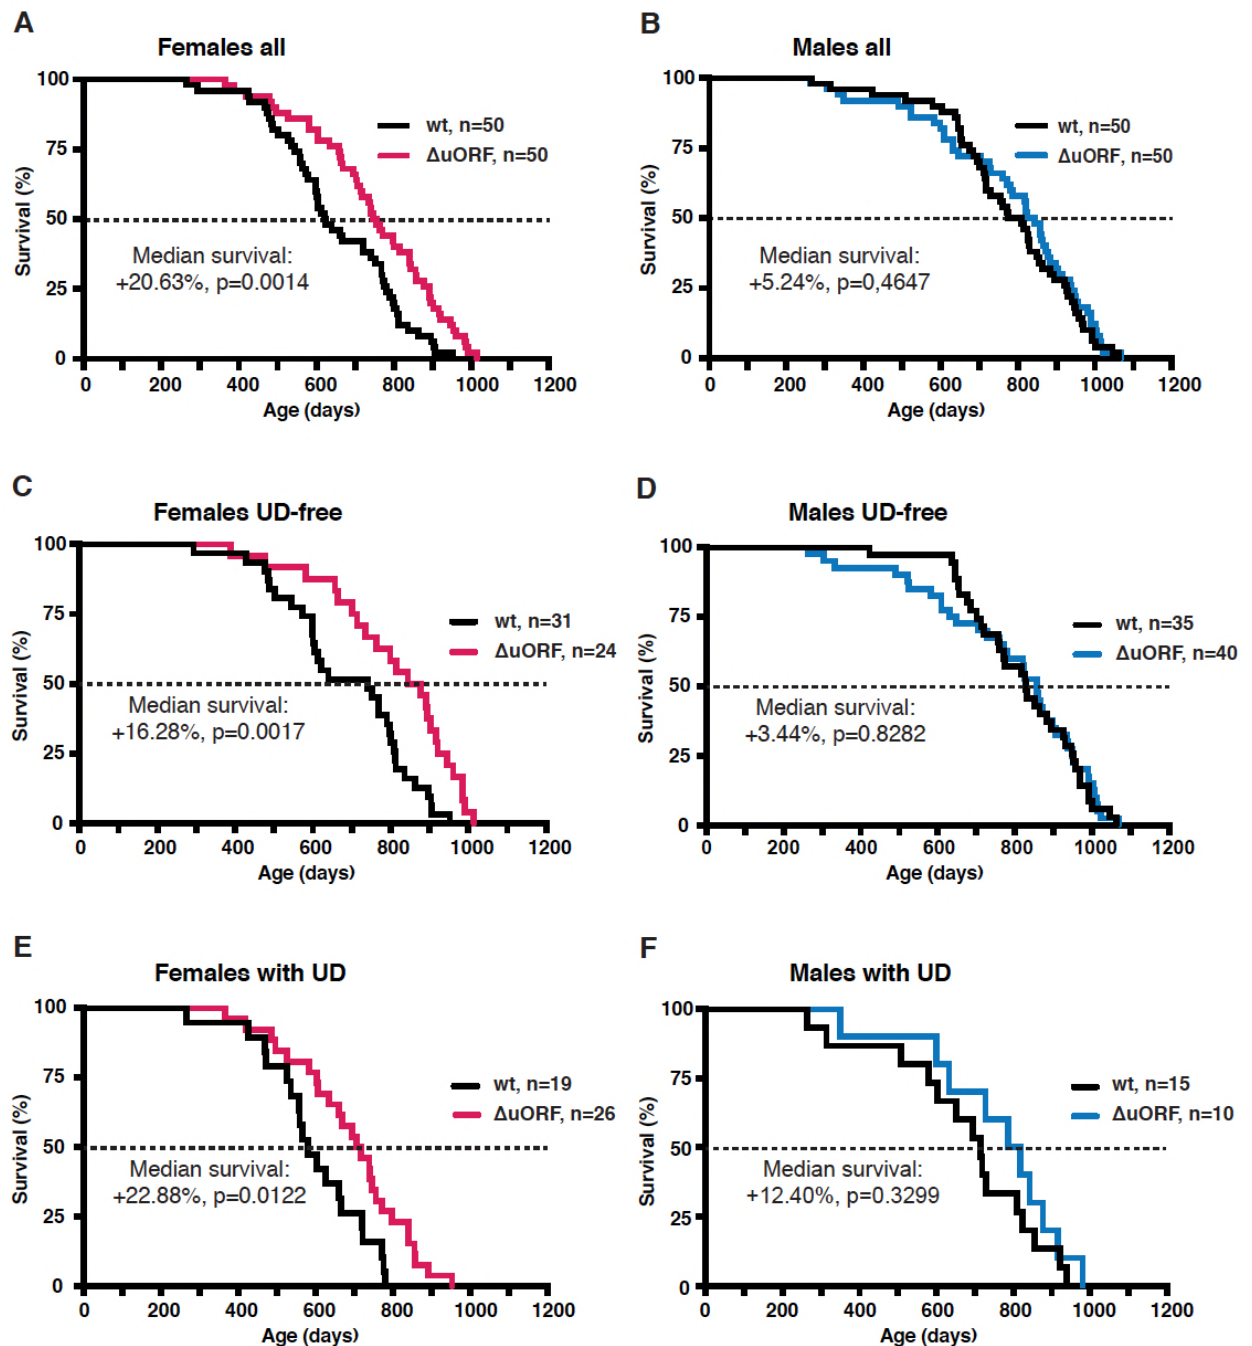

834

835 **Figure 2.** Increased survival of female  $C/EBP\beta^{\Delta uORF}$  mice. Survival curves of (A) the complete  
 836 female cohorts, (B) complete male cohorts, (C) the UD-free female cohorts, (D) UD-free male  
 837 cohorts, (E) female mice with UD and (f) male mice with UD with the survival curves of wt or  
 838  $C/EBP\beta^{\Delta uORF}$  mice indicated. The increase in median survival (%) of  $C/EBP\beta^{\Delta uORF}$  compared  
 839 to wt littermates and statistical significance of the increase in the overall survival as  
 840 determined by the log-rank test is indicated in the figure.

Figure 3

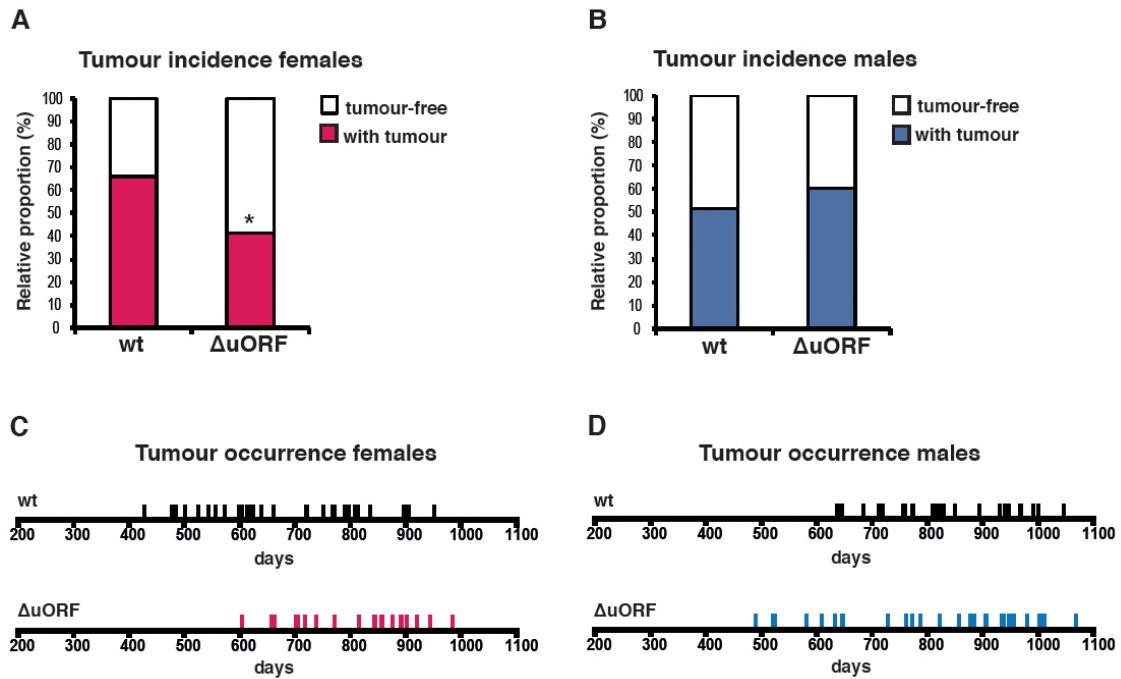

841

842 **Figure 3.** Reduced incidence and delayed occurrence of tumours is female  $C/EBP\beta^{\Delta uORF}$

843 mice. (A) Tumour incidence of females as determined by pathological examination of

844 neoplasms found upon necropsy of mice from the lifespan cohorts (wt, n= 50;  $C/EBP\beta^{\Delta uORF}$ ,

845 n=48). Statistical significance was calculated using Fisher's exact test with \*p<0.05. (B)

846 Tumour incidence of males as determined by pathological examination of neoplasms found

847 upon necropsy (wt, n=47;  $C/EBP\beta^{\Delta uORF}$ , n=45. (C) Tumour occurrence in the female lifespan

848 cohorts upon necropsy is shown for wt (black lines) and  $C/EBP\beta^{\Delta uORF}$  mice (red lines). (D)

849 Tumour occurrence in the male lifespan cohorts upon necropsy is shown for wt (black lines)

850 and  $C/EBP\beta^{\Delta uORF}$  mice (blue lines).

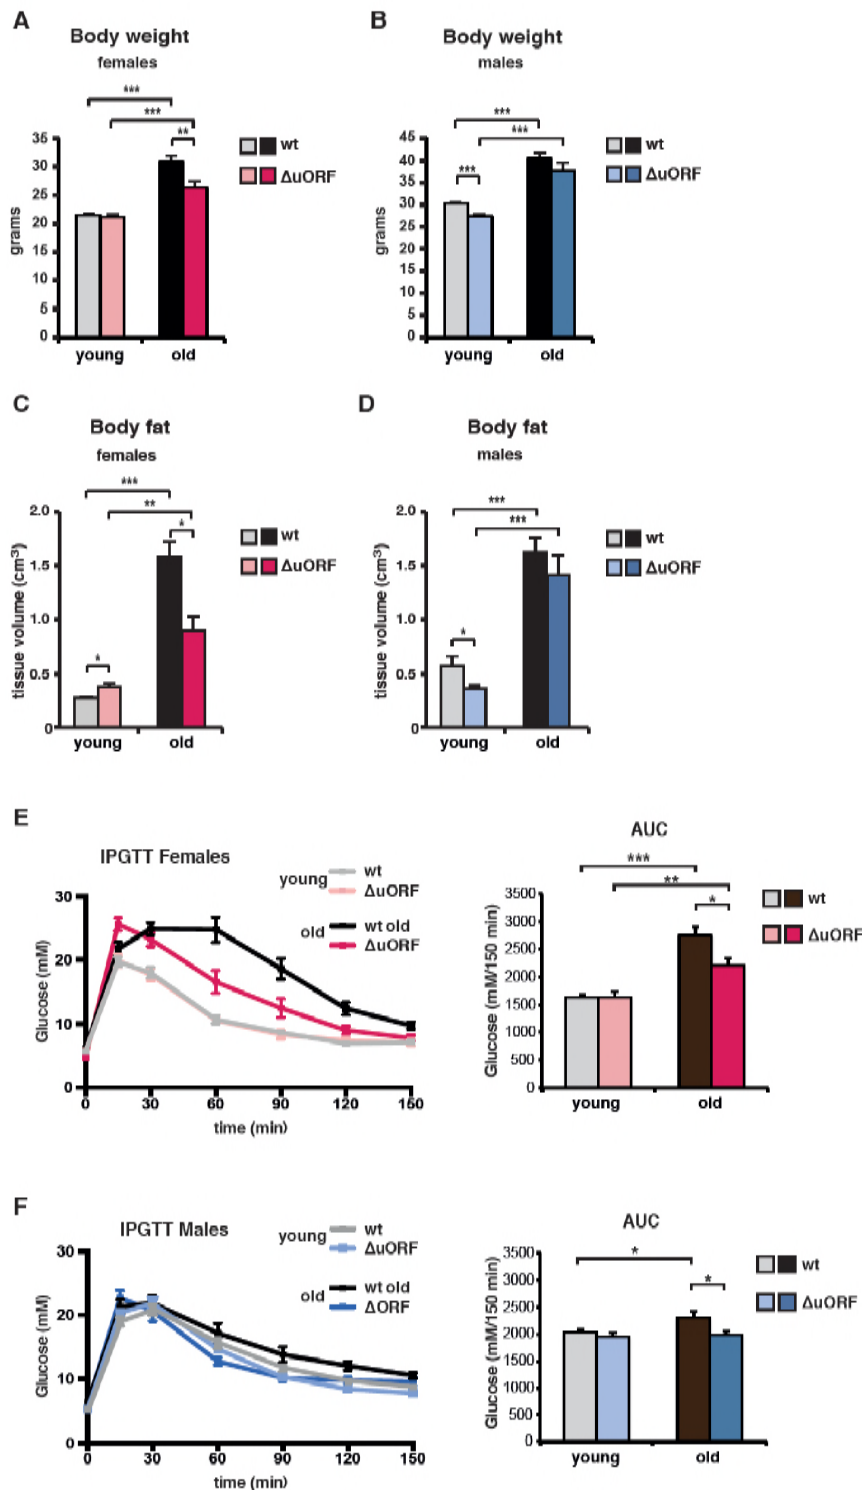

851 **Figure 4.** Ageing-associated increase in body weight, fat content and glucose tolerance is  
 852 attenuated in female  $C/EBP\beta^{\Delta uORF}$  mice. (A) Body weight (g) of young (4 months) and old (19  
 853 months) female mice (wt, n=11 young, n=12 old;  $C/EBP\beta^{\Delta uORF}$ , n=11 young, n=12 old). (B)  
 854 Body weight of young (4 months) and old (21 months) male mice (wt, n=12 young and old;  
 855  $C/EBP\beta^{\Delta uORF}$ , n=12 young, n=11 old). (C) Body fat content (cm<sup>3</sup>) as determined by CT  
 856 analysis of young (4 months) and old (19 months) female mice (wt, n=11 young and old;  
 857  $C/EBP\beta^{\Delta uORF}$ , n=9 young, n=11 old). (D) Body fat content of young (4 months) and old (21  
 858 months) male mice (wt, n=12 young and old wt;  $C/EBP\beta^{\Delta uORF}$ , n=11 young, n=9 old). (E and  
 859 F) i.p.-Glucose Tolerance Test (IPGTT) was performed with young (4 months) and old  
 860 (female 19 months, male 21 months) wt and  $C/EBP\beta^{\Delta uORF}$  (E) females and (F) males. The  
 861 area under the curve (AUC) at the right shows the quantification (wt females, n=9 young,  
 862 n=10 old;  $C/EBP\beta^{\Delta uORF}$  females, n=10 young, n=11 old; wt males, n=12 young, n=11 old;  
 863  $C/EBP\beta^{\Delta uORF}$  males, n=11 young, n=10 old). P-values were determined by Student's t-test,  
 864 \*p<0.05; \*\*p<0.01; \*\*\*p<0.001.

Figure 5

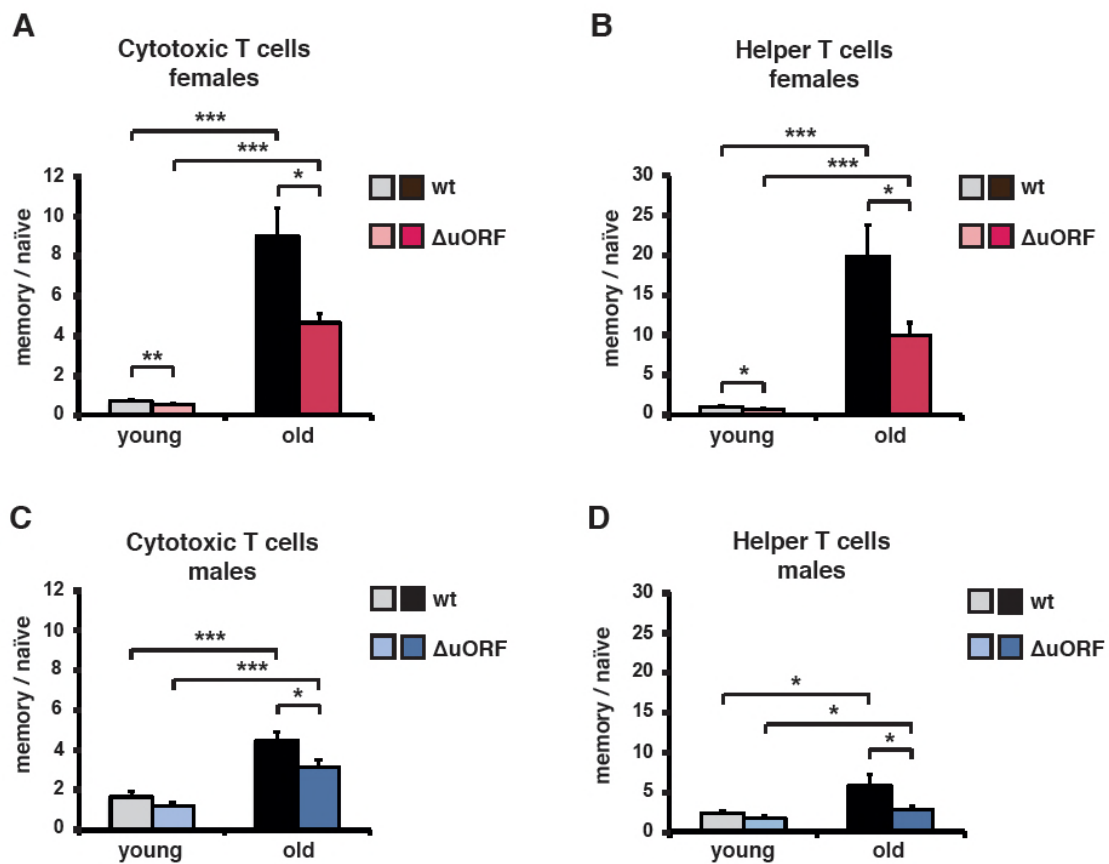

865

866

867

868

869

870

871

872

**Figure 5.** Ageing-associated increase of the memory / naïve T-cell ratio is attenuated in  $C/EBP\beta^{\Delta uORF}$  mice. The ratio between  $CD44^{high}$  memory T cells and  $CD44^{low}/CD62L^{high}$  naïve T cells in blood is shown for young (5 months) and old (female 20 months, male 22 months) (A, B) females and (C, D) males for both (a, c)  $CD8^{+}$  cytotoxic and (B, D)  $CD4^{+}$  helper T cells as was determined by flow cytometry (wt females, n=10 young, n=12 old; wt males n=12 young and old;  $C/EBP\beta^{\Delta uORF}$  females, n=10 young, n=11 old;  $C/EBP\beta^{\Delta uORF}$  males, n=12 young and old). P-values were determined by Student's t-test, \*p<0.05; \*\*\*p<0.001.

Figure 6

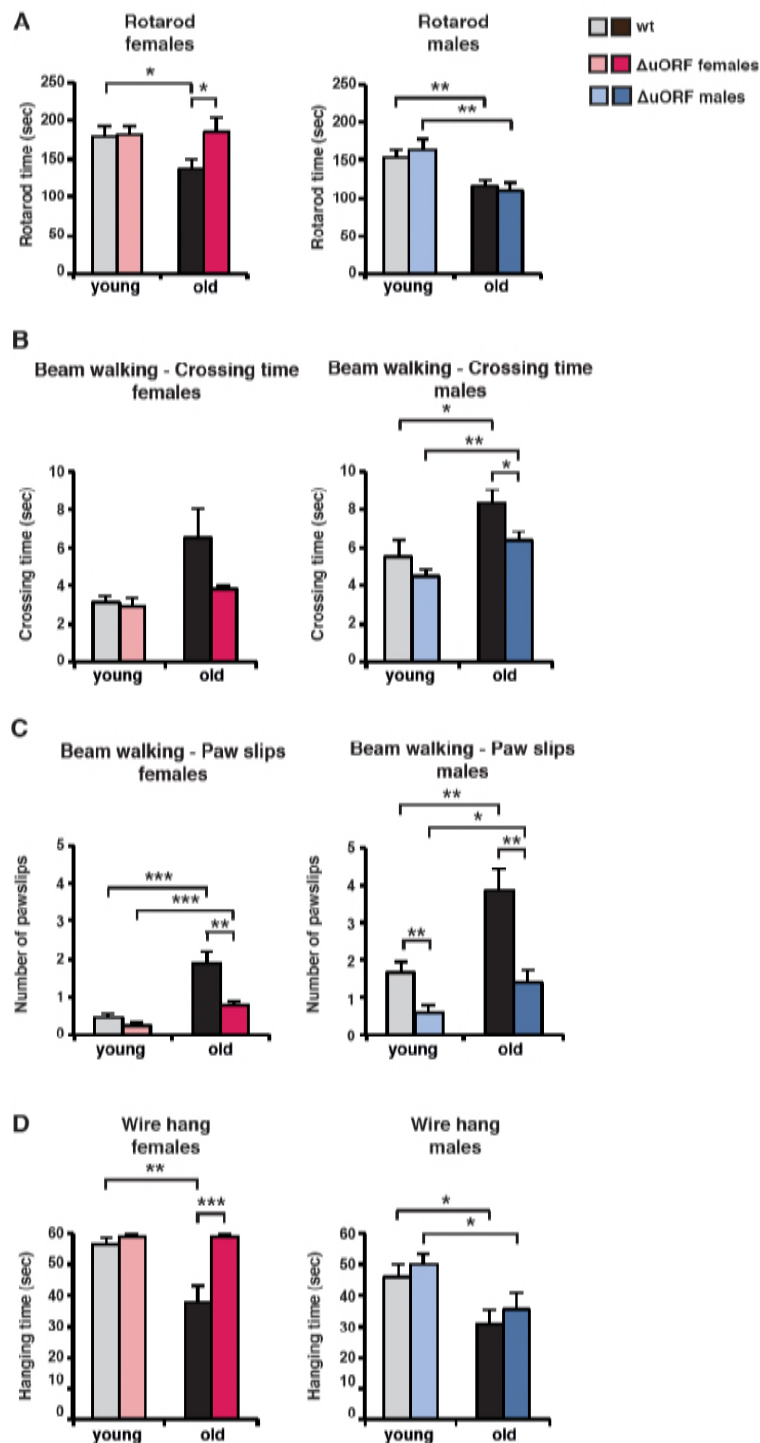

873 **Figure 6.** Ageing associated loss of motor coordination and grip strength is attenuated in  
 874  $C/EBP\beta^{\Delta uORF}$  mice. (A) Rotarod performance (time in sec of stay on the rotarod) of young (4  
 875 months) and old (female 19 months, male 21 months) wt and  $C/EBP\beta^{\Delta uORF}$  mice is shown  
 876 separately for females (left) and males (right) (wt females, n=12 young, n=12 old; wt males,  
 877 n=12 young and old;  $C/EBP\beta^{\Delta uORF}$  females, n=11 young, n=12 old;  $C/EBP\beta^{\Delta uORF}$  males, n=12  
 878 young, n=11 old). (B) The crossing time (sec) of the beam walking test of young and old wt  
 879 and  $C/EBP\beta^{\Delta uORF}$  mice, and (C) the number of mistakes (paw slips) made while crossing the  
 880 beam is shown separately for females and males (wt females, n=11 young, n=12 old; wt  
 881 males, n=12 young and old;  $C/EBP\beta^{\Delta uORF}$  females, n=11 young, n=12 old;  $C/EBP\beta^{\Delta uORF}$   
 882 males, n=12 young, n=10 old). (D) Grip strength as determined with the wire hang test as  
 883 hanging time (sec) of young and old wt and  $C/EBP\beta^{\Delta uORF}$  mice for females and males  
 884 separately. N=11 for young wt and  $C/EBP\beta^{\Delta uORF}$  females and for old  $C/EBP\beta^{\Delta uORF}$  females  
 885 and n= 12 for old wt females; n=11 for young and old wt males; n=12 for young  $C/EBP\beta^{\Delta uORF}$   
 886 males and n=10 for old  $C/EBP\beta^{\Delta uORF}$  males. P-values were determined by Student's t-test,  
 887 \*p<0.05; \*\*p<0.01; \*\*\*p<0.001.

Figure 7

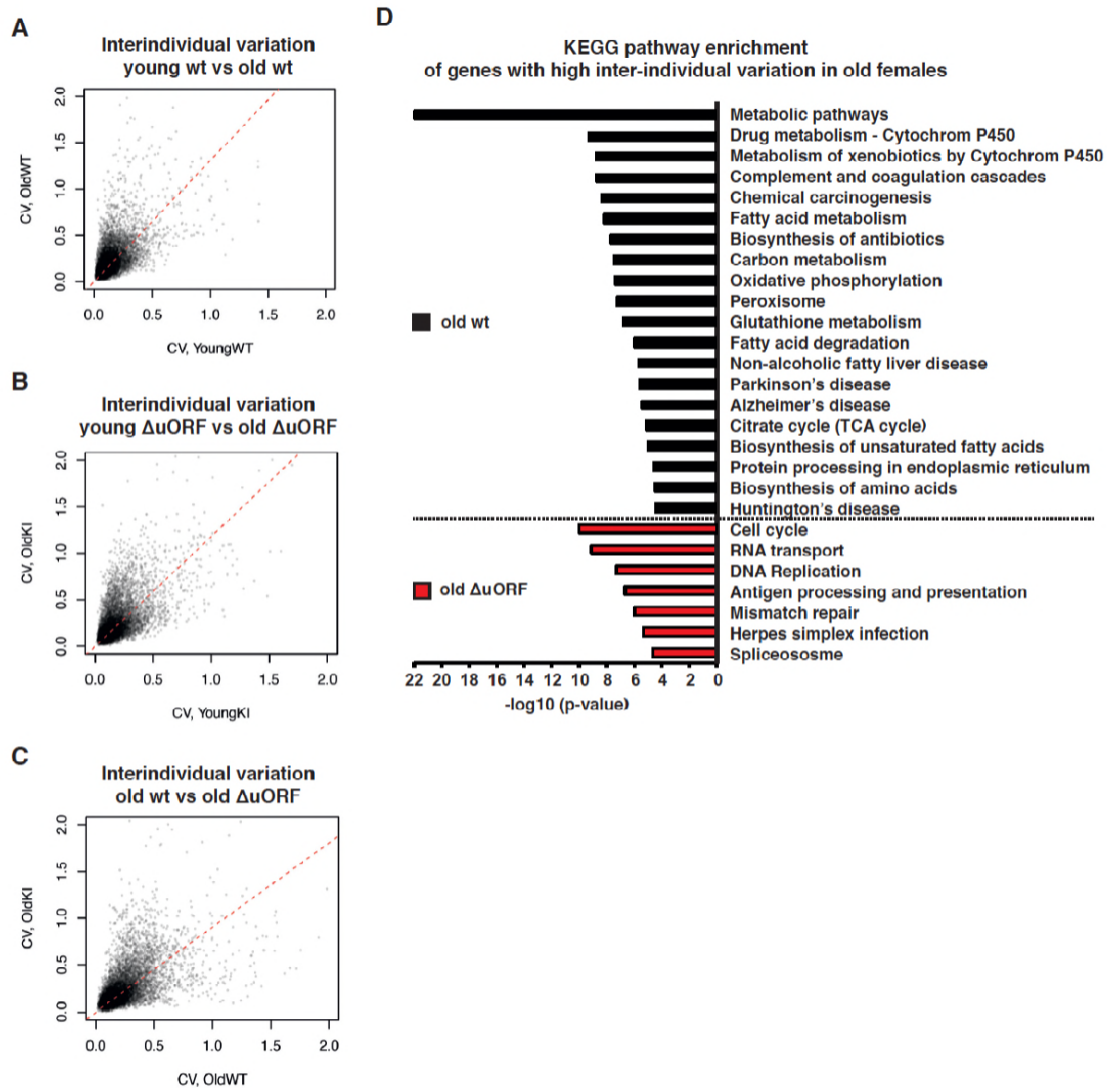

888

889 **Figure 7.** Ageing-associated increase of inter-individual variation of gene expression affects  
 890 different genes in livers from wt and C/EBPβ<sup>ΔuORF</sup> mice. (A-C) Inter-individual variability of liver  
 891 transcripts compared between (A) young (5 months) versus old (20 months) female wt mice,  
 892 (B) young (5 months) versus old (20 months) C/EBPβ<sup>ΔuORF</sup> female mice and (C) old wt (20  
 893 months) versus old C/EBPβ<sup>ΔuORF</sup> (20 months) female mice (n=6 for young and old wt and  
 894 C/EBPβ<sup>ΔuORF</sup> for A,B,C). Coefficient of variation of transcripts with mean expression >1 FPM  
 895 is plotted against the coefficient of variation of the other group as indicated. Dashed red line  
 896 represents linear regression and is shifted towards the side that shows higher inter-individual  
 897 variability. (D) KEGG pathway enrichment analysis of genes that show increased inter-  
 898 individual variability in livers from old wt females compared to old C/EBPβ<sup>ΔuORF</sup> females  
 899 (Coefficient of variation of wt genes is more than twice as the coefficient of variation of the  
 900 same gene in C/EBPβ<sup>ΔuORF</sup> females) as indicated by the black bars or of genes that show  
 901 increased inter-individual variability in livers from old C/EBPβ<sup>ΔuORF</sup> females compared to old  
 902 wt C/EBPβ<sup>ΔuORF</sup> females (Coefficient of variation of C/EBPβ<sup>ΔuORF</sup> genes is more than twice as  
 903 the coefficient of variation of the same gene in wt females) as indicated by the red bars. The  
 904 x-axis indicates the p-value. Only pathways that show significant enrichment (FDR < 0.05) are  
 905 shown.

906

**Figure 8**

**A. wt mice**

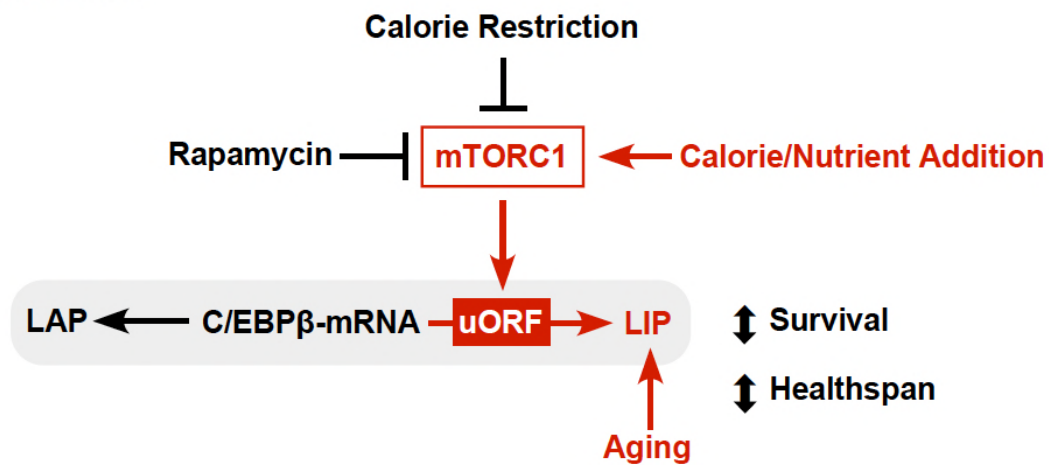

**B. C/EBPβ<sup>ΔuORF</sup> mice**

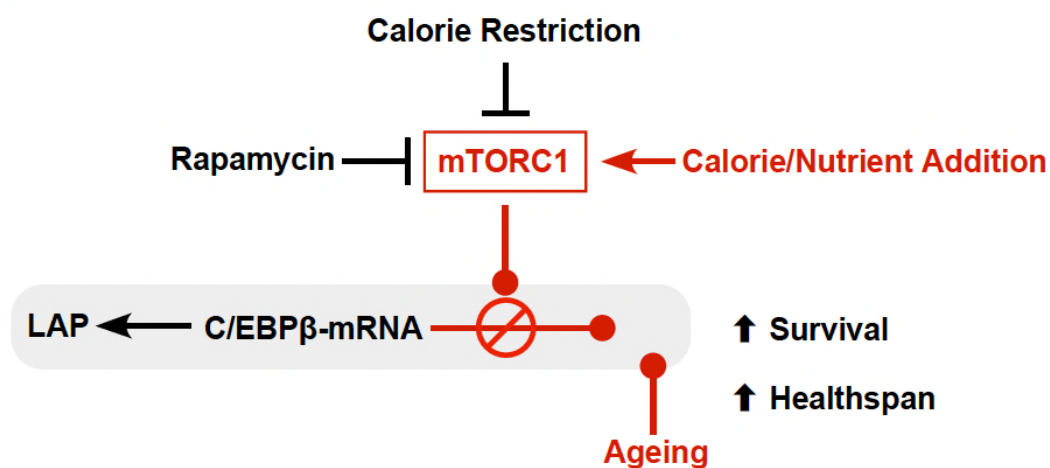

907

908 **Figure 8.** Model explaining regulation of LIP under control of mTORC1. (A) In wt mice  
909 C/EBPβ-mRNA translation into LIP is modulated by calorie/nutrient availability through  
910 mTORC1 signalling. In addition LIP is upregulated by mechanisms during aging that are not  
911 well understood. Expression of LAP is not affected. (B) Deficient expression of LIP in  
912 C/EBPβ<sup>ΔuORF</sup> mice mimics reduced mTORC1 signalling at the level of C/EBPβ function and  
913 prevents the age-associated upregulation of LIP and results in health- and lifespan extension.

## Supplement

### Figure supplement 1

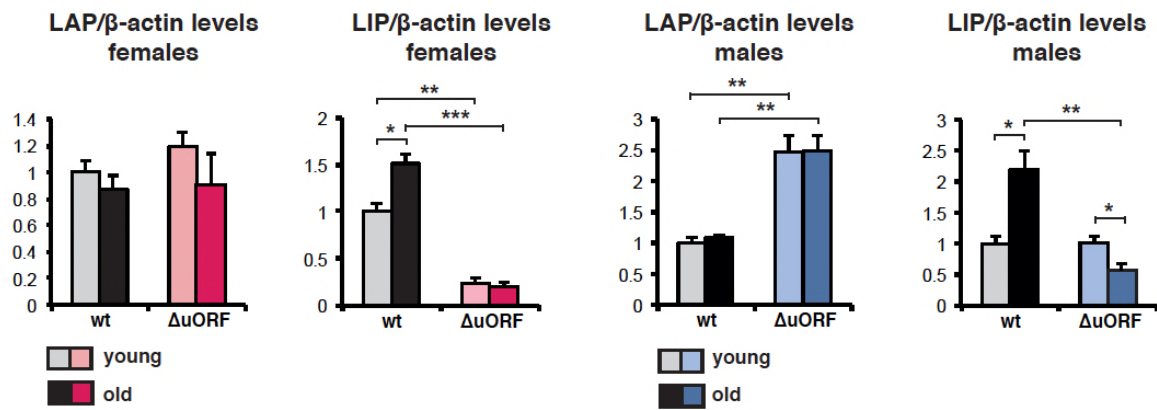

**Figure supplement 1.** Quantification chemiluminescence digital imaging of LAP or LIP signals in livers in respect to  $\beta$ -actin levels using immunoblots presented in Figure 1A and B and additional immunoblots from young (5 month) and old (female 20 months, male 22 months) mice (wt females, n=9 young and old; wt males, n=10 young, n=11 old; C/EBP $\beta^{\Delta uORF}$  females, n=10 young, n=11 old; C/EBP $\beta^{\Delta uORF}$  males, n=11 young, n=10 old). P-values were determined by Student's t-test, \*p<0.05; \*\*p<0.01; \*\*\*p<0.001.



Figure supplement 2

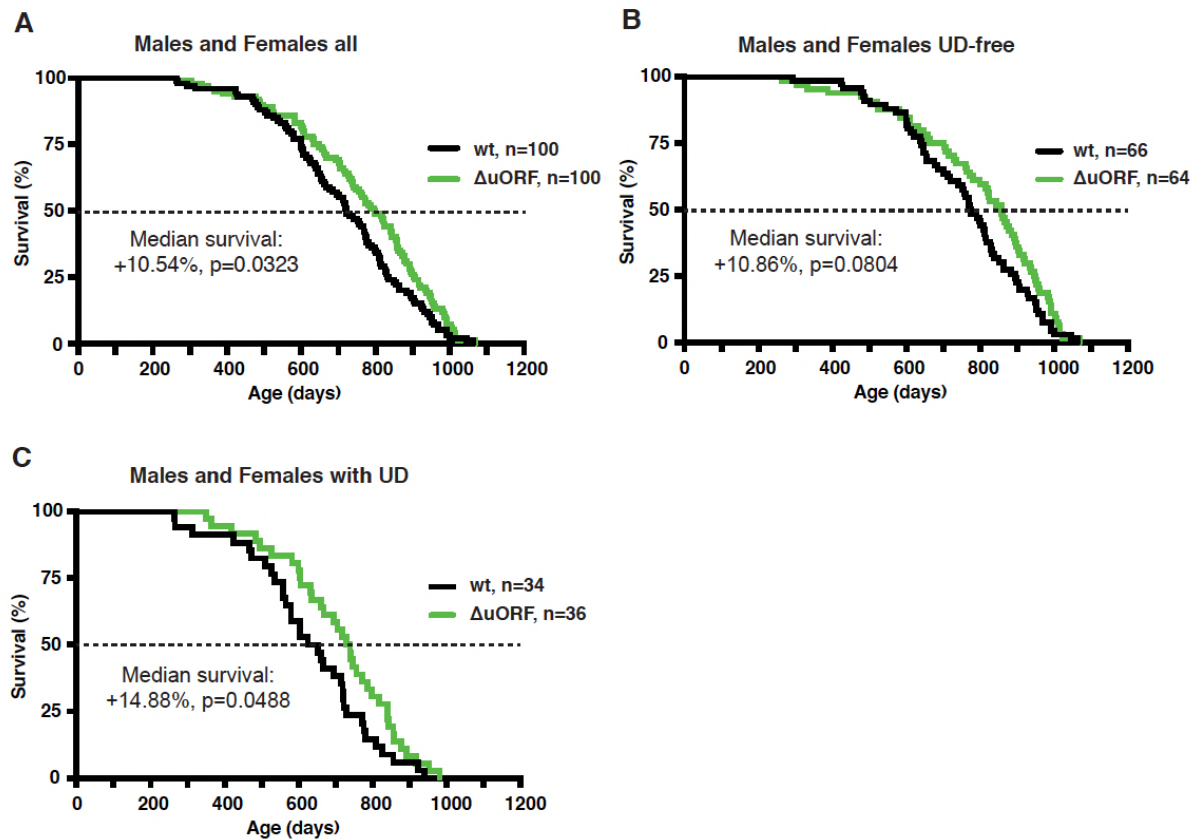

**Figure supplement 2.** Survival curves of wt and  $C/EBP\beta^{\Delta uORF}$  mice with females and males combined of (A) the complete cohorts, (B) UD-free mice cohorts and (C) cohorts of mice with UD. For survival curves the increase in median survival (%) of the  $C/EBP\beta^{\Delta uORF}$  compared to wt mice and statistical significance of the increase in the overall survival as determined by the log-rank test is indicated in the figure.

Figure supplement 3

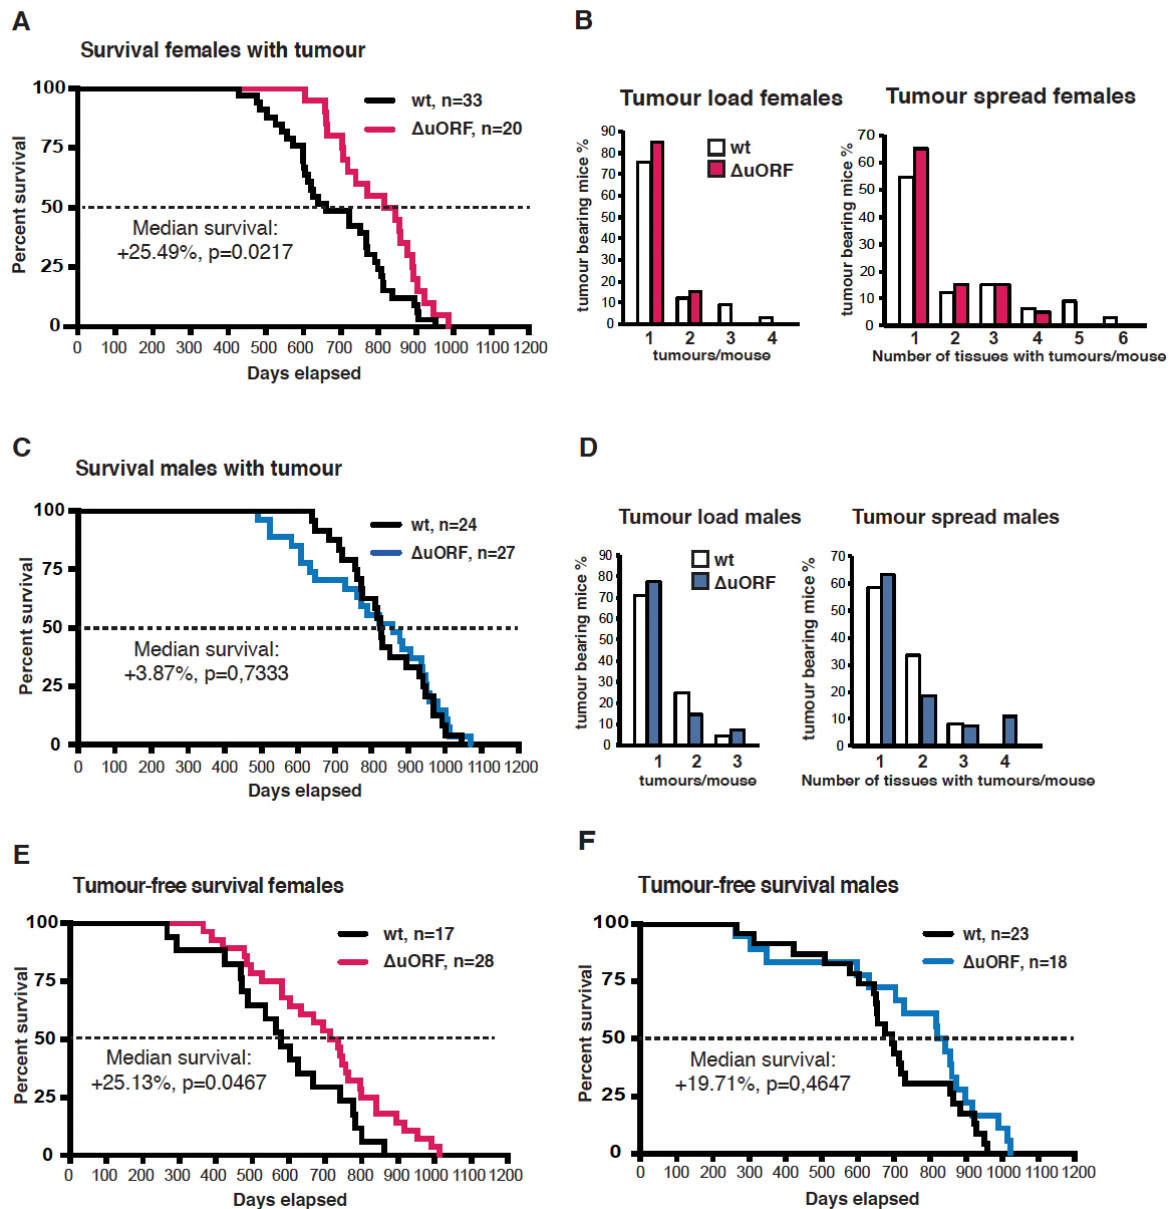

Figure supplement 3.

(A) Survival curves of wt and  $C/EBP\beta^{\Delta uORF}$  tumour-bearing female mice. (B) At the left, tumour load in wt and  $C/EBP\beta^{\Delta uORF}$  females as determined by the number of different tumour types found per tumour bearing mouse. At the right, tumour spread in wt and  $C/EBP\beta^{\Delta uORF}$  females as determined by the number of tissues affected by tumours in tumour bearing mice irrespective of the tumour type (in case different tumour types were found in the same tissue it was counted as >1). (C) Survival curves of wt and  $C/EBP\beta^{\Delta uORF}$  tumour-bearing male mice. (D) At the left tumour load and at the right tumour spread in wt and  $C/EBP\beta^{\Delta uORF}$  males as described under (C). (E) Survival curves of wt and  $C/EBP\beta^{\Delta uORF}$  tumour-free female mice. (F) Survival curves of wt and  $C/EBP\beta^{\Delta uORF}$  tumour-free male mice. For survival curves the increase in median survival (%) of the  $C/EBP\beta^{\Delta uORF}$  compared to wt mice and statistical significance of the increase in the overall survival as determined by the log-rank test is indicated in the figure.

Figure supplement 4

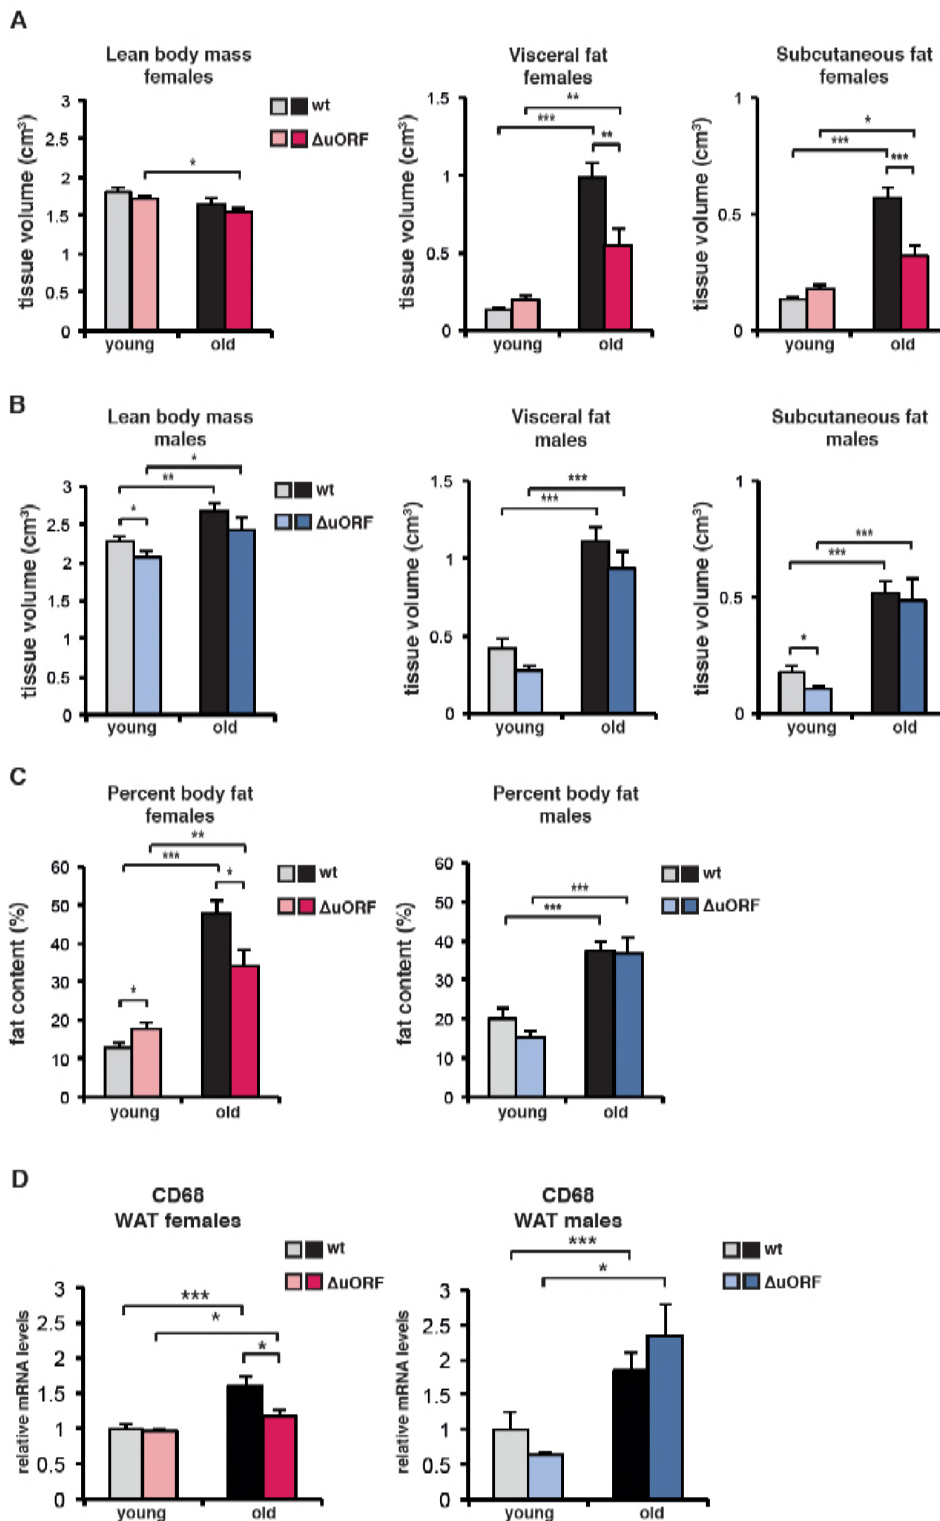

Figure supplement 4.

Body composition of young (4 months) and old (females 19 months, males 21 months) wt and  $C/EBP\beta^{\Delta uORF}$  mice was determined by computer tomography (CT) analysis. (A) The bar graphs show tissue volumes (cm<sup>3</sup>) of lean body mass, visceral fat and subcutaneous fat for females, and (B) for males. (C) Percentage of body fat for females (left) or males (right). (wt females, n=11 young and old; wt males, n=12 young and old;  $C/EBP\beta^{\Delta uORF}$  females, n=9 young, n=11 old;  $C/EBP\beta^{\Delta uORF}$  males, n=11 young, n=9 old). (d) Relative CD68 mRNA levels as determined by quantitative real-time PCR in visceral fat of young (5 months) and old (females 20 months, males 22 months) wt and  $C/EBP\beta^{\Delta uORF}$  females (left) and males (right) as a measure for

macrophage infiltration (wt females, n=11 young and old; wt males, n=11 young, n=12 old;  $C/EBP\beta^{\Delta uORF}$  females, n=11 young and old;  $C/EBP\beta^{\Delta uORF}$  males, n=11 young, n=10 old). P-values were determined by Student's t-test, \*p<0.05; \*\*p<0.01; \*\*\*p<0.001.

Figure supplement 5

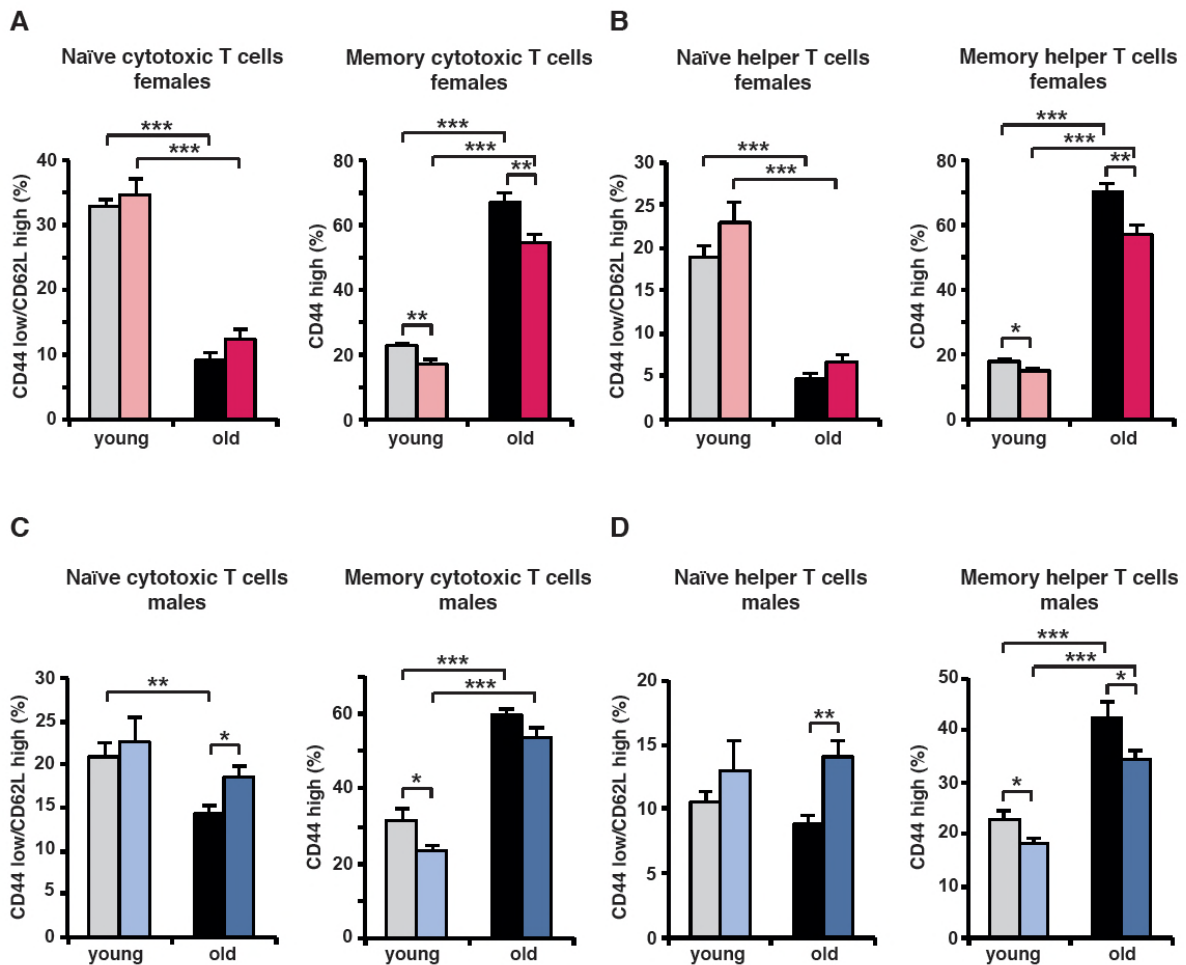

**Figure supplement 5.** (A) At the left, for females the percentage naïve cytotoxic T cells ( $CD44^{low}/CD62L^{high}$ ) in respect to the total amount of cytotoxic T cells ( $CD8^{+}$ ); at the right, percentage of memory ( $CD44^{high}$ ) cytotoxic T cells in respect to the total amount of cytotoxic ( $CD8^{+}$ ) T cells. (B) At the left, for females the percentage naïve helper T cells ( $CD44^{low}/CD62L^{high}$ ) in respect to the total amount of helper T cells ( $CD4^{+}$ ); at the right percentage memory T cells ( $CD44^{high}$ ) in respect to the total amount of helper T cells ( $CD4^{+}$ ). (C) The same analysis as in (A) for males. (D) The same analysis as in (B) for males. (wt females, n=10 young, n=12 old; wt males, n=12 young and old; C/EBP $\beta^{\Delta uORF}$  females, n=10 young, n=12 old; C/EBP $\beta^{\Delta uORF}$  males, n=12 young and old). P-values were determined by Student's t-test, \*p<0.05; \*\*p<0.01; \*\*\*p<0.001.

## Figure supplement 6

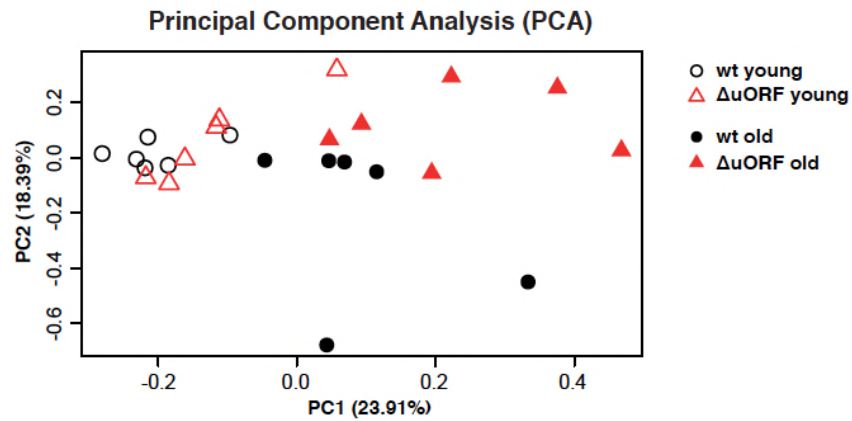

**Figure supplement 6.** Principal component analysis (PCA) of transcriptome profiles obtained from livers of 5 and 20 months old wt and C/EBP $\beta$  $\Delta$ uORF female mice (n=6 for all groups). The main principal component PC1 (x axis, 23,91%) reflects expression changes due to ageing independent of the genotype and the second component PC2 (y axis, 18,39%) reflects expression changes due to the genotype.

## Figure supplement 7

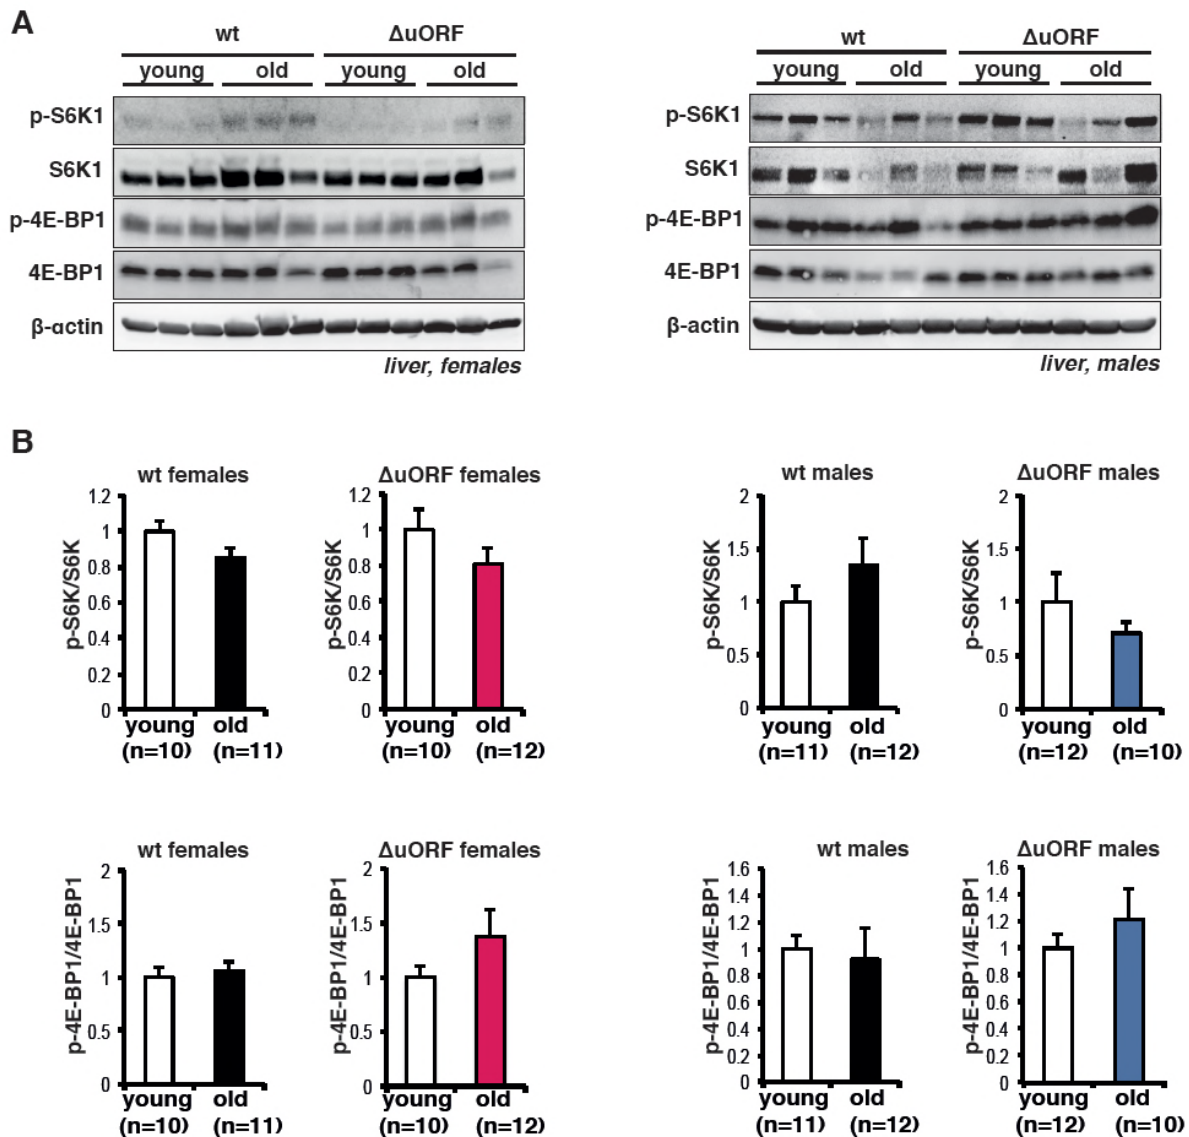

**Figure supplement 7.** (A) Immunoblots show pan-levels and phosphorylation of the mTORC1 downstream targets S6K1 and 4E-BP1 in liver extracts from young (5 month) and old (females 20 months, males 22 months) of female (left) and male (right) wt and  $C/EBP\beta^{\Delta uORF}$  mice.  $\beta$ -actin detection served as loading control. (B) Quantification by chemiluminescence digital imaging of phosphorylated proteins in respect to the respective pan levels from the blots presented in (A) and from additional immunoblots (wt females, n=10 young, n=11 old; wt males, n=11 young, n=12 old;  $C/EBP\beta^{\Delta uORF}$  females, n=10 young, n=12 old;  $C/EBP\beta^{\Delta uORF}$  males, n=12 young, n=10 old). P-values were determined by Student's t-test, \*p<0.05; \*\*p<0.01; \*\*\*p<0.001.

## Table supplement 1

Lifespan experiment summary of results

| Genotype                                    | sex     | N <sup>1</sup> | Median <sup>2</sup> | Increase <sup>3</sup> | P <sub>Surv</sub> <sup>4</sup> | Mean <sup>5</sup> | SEM <sup>6</sup> | N <sub>max</sub> <sup>7</sup> | P <sub>max</sub> <sup>8</sup> |
|---------------------------------------------|---------|----------------|---------------------|-----------------------|--------------------------------|-------------------|------------------|-------------------------------|-------------------------------|
| <b>All mice</b>                             |         |                |                     |                       |                                |                   |                  |                               |                               |
| C/EBPβ <sup>ΔuORF</sup>                     | Females | 50             | 751.5               | 20.63                 | 0.0014                         | 747.42            | 23.7             | 9                             | 0.0157                        |
| wt                                          | Females | 50             | 623.0               |                       |                                | 650.96            | 22.5             | 1                             |                               |
| C/EBPβ <sup>ΔuORF</sup>                     | Males   | 50             | 833.5               | 5.24                  | 0.4647                         | 781.90            | 28.8             | 6                             | 0.7407                        |
| wt                                          | Males   | 50             | 792.0               |                       |                                | 777.68            | 24.8             | 4                             |                               |
| C/EBPβ <sup>ΔuORF</sup>                     | Both    | 100            | 797.0               | 10.54                 | 0.0323                         | 764.66            | 18.6             | 13                            | 0.2381                        |
| wt                                          | Both    | 100            | 721.0               |                       |                                | 714.32            | 17.8             | 7                             |                               |
| <b>Mice ulcerative dermatitis (UD)-free</b> |         |                |                     |                       |                                |                   |                  |                               |                               |
| C/EBPβ <sup>ΔuORF</sup>                     | Females | 24             | 860.5               | 16.28                 | 0.0017                         | 809.29            | 34.10            | 5                             | 0.0755                        |
| wt                                          | Females | 31             | 740.0               |                       |                                | 686.07            | 29.71            | 1                             |                               |
| C/EBPβ <sup>ΔuORF</sup>                     | Males   | 40             | 857.5               | 3.44                  | 0.8282                         | 789.10            | 33.11            | 6                             | 0.2710                        |
| wt                                          | Males   | 35             | 829.0               |                       |                                | 821.49            | 24.75            | 2                             |                               |
| C/EBPβ <sup>ΔuORF</sup>                     | Both    | 64             | 857.5               | 10.86                 | 0.0804                         | 796.67            | 24.19            | 8                             | 0.3936                        |
| wt                                          | Both    | 66             | 773.5               |                       |                                | 757.88            | 20.78            | 5                             |                               |
| <b>Mice with UD</b>                         |         |                |                     |                       |                                |                   |                  |                               |                               |
| C/EBPβ <sup>ΔuORF</sup>                     | Females | 26             | 711.5               | 22.88                 | 0.0122                         | 690.31            | 37.37            | 5                             | 0.0634                        |
| wt                                          | Females | 19             | 579.0               |                       |                                | 593.68            | 30.65            | 0                             |                               |
| C/EBPβ <sup>ΔuORF</sup>                     | Males   | 10             | 802.5               | 12.40                 | 0.3299                         | 753.1             | 58.63            | 1                             | 1.0                           |
| wt                                          | Males   | 15             | 714.0               |                       |                                | 675.47            | 51.28            | 2                             |                               |
| C/EBPβ <sup>ΔuORF</sup>                     | Both    | 36             | 733.5               | 14.88                 | 0.0488                         | 707.75            | 26.67            | 5                             | 0.4297                        |
| wt                                          | Both    | 34             | 638.5               |                       |                                | 629.77            | 28.78            | 2                             |                               |

<sup>1</sup>Number of animals in the cohort

<sup>2</sup>Median survival of the cohort (days)

<sup>3</sup>Increase of the median survival (percent)

<sup>4</sup>P-value of the increased survival (log-rank test)

<sup>5</sup>Mean lifespan of the cohort (days)

<sup>6</sup>Standard error of the mean

<sup>7</sup>Number of mice in the cohort in the longest-lived decile of the combined cohort (wt and C/EBPβ<sup>ΔuORF</sup>)

<sup>8</sup>P-value of increased N<sub>max</sub><sup>7</sup> (Fisher's exact test)

## Table supplement 2

Tumour spectrum in wt and C/EBP $\beta^{\Delta uORF}$  mice

| Tumour type                 | Location                                                                    | wt females | $\Delta uORF$ females | wt males | $\Delta uORF$ males |
|-----------------------------|-----------------------------------------------------------------------------|------------|-----------------------|----------|---------------------|
| Lymphoma *                  | different                                                                   | 15         | 6                     | 1        | 4                   |
| Hepatocellular carcinoma    | liver                                                                       | 8          | 4                     | 14       | 6                   |
| Histiocytic sarcoma         | liver, colon, intestine, spleen                                             | 8          | 3                     | 14       | 9                   |
| Myeloid neoplasms **        | different                                                                   | 4          | 4                     | 4        | 6                   |
| Adenocarcinoma              | pituitary, mammary gland, haderian gland, intestine                         | 2          | 2                     | 0        | 3                   |
| Bronchio-alveolar carcinoma | lung                                                                        | 0          | 1                     | 0        | 3                   |
| Mast cell tumour            | stomach, liver                                                              | 1          | 0                     | 0        | 1                   |
| Anaplastic sarcoma          | leg, side                                                                   | 1          | 1                     | 0        | 0                   |
| Osteosarcoma                | leg                                                                         | 1          | 0                     | 0        | 0                   |
| Undifferentiated sarcoma    | pancreas, colon, kidney                                                     | 0          | 0                     | 0        | 1                   |
| Squamous cell carcinoma     | penis                                                                       | 0          | 0                     | 1        | 0                   |
| Benign neoplasms            | bladder, neck, spleen, liver                                                | 3          | 1                     | 1        | 0                   |
| Unidentified***             | liver, kidney, colon, spleen, lung, throat, abdominal cavity, adrenal gland | 6          | 5                     | 3        | 2                   |

\*incl. lymphoid leukaemia

\*\*incl. malignant round cell neoplasms

\*\*\*tumour type could not be unequivocally determined due to inadequate quality of the fixed tumour tissue

Absolute numbers of mice with the indicated tumour type of tumours found during necropsy for wt and C/EBP $\beta^{\Delta uORF}$  males and females are shown. Note that the total number of tumours is higher than the number of tumour-bearing mice due to the eventual occurrence of different tumour types in the same mouse.



### Table supplement 3

#### Occurrence of ageing-associated pathologies in wt and C/EBP $\beta^{\Delta uORF}$ mice

| Tissue   | Pathology/Histology                  |                                                                                  | wt females                                              | $\Delta uORF$ females                                      | wt males                                                 | $\Delta uORF$ males                                        |
|----------|--------------------------------------|----------------------------------------------------------------------------------|---------------------------------------------------------|------------------------------------------------------------|----------------------------------------------------------|------------------------------------------------------------|
| Liver    | Hepatocellular vacuolation           | Number <sup>1</sup><br>Grade <sup>2</sup> $\pm$ SEM<br>Significance <sup>3</sup> | 9 (9)<br>1.06 $\pm$ 0.19                                | 9 (9)<br>1.06 $\pm$ 0.13                                   | 9 (9)<br>1.5 $\pm$ 0.20                                  | 9 (9)<br>0.67 $\pm$ 0.12<br><b>p &lt; 0.01</b>             |
|          | Cytoplasmic nuclear inclusions       | Number <sup>1</sup><br>Grade <sup>2</sup> $\pm$ SEM<br>Significance <sup>3</sup> | 2 (9)<br>0.06 $\pm$ 0.04                                | 2 (9)<br>0.14 $\pm$ 0.11<br>ns                             | 9 (9)<br>1.11 $\pm$ 0.14                                 | 5 (9)<br>0.33 $\pm$ 0.14<br><b>p &lt; 0.01</b>             |
|          | Polyploidy                           | Number <sup>1</sup><br>Grade <sup>2</sup> $\pm$ SEM<br>Significance <sup>3</sup> | 9 (9)<br>1.39 $\pm$ 0.11                                | 9 (9)<br>1.72 $\pm$ 0.17<br>ns                             | 9 (9)<br>2.28 $\pm$ 0.09                                 | 9 (9)<br>2.06 $\pm$ 0.10<br>ns                             |
| Pancreas | Lymphoplasmatic inflammation         | Number <sup>1</sup><br>Grade <sup>2</sup> $\pm$ SEM<br>Significance <sup>3</sup> | 4 (9)<br>0.44 $\pm$ 0.19                                | 8 (9)<br>1.28 $\pm$ 0.28<br><b>p &lt; 0.05</b>             | 4 (9)<br>0.39 $\pm$ 0.22                                 | 7 (9)<br>0.72 $\pm$ 0.21<br>ns                             |
|          | Islet cell hyperplasia               | Number <sup>1</sup><br>Grade <sup>2</sup> $\pm$ SEM<br>Significance <sup>3</sup> | 7 (9)<br>0.72 $\pm$ 0.17                                | 4 (9)<br>0.28 $\pm$ 0.12<br><b>p &lt; 0.05</b>             | 6 (9)<br>0.50 $\pm$ 0.17                                 | 1 (9)<br>0.06 $\pm$ 0.06<br><b>p &lt; 0.05</b>             |
|          | Focal acinar cell atrophy            | Number <sup>1</sup><br>Grade <sup>2</sup> $\pm$ SEM<br>Significance <sup>3</sup> | 0 (9)<br>0                                              | 2 (9)<br>0.11 $\pm$ 0.07<br>ns                             | 2 (9)<br>0.17 $\pm$ 0.12                                 | 1 (9)<br>0.06 $\pm$ 0.06<br>ns                             |
|          | Fatty replacement of acinar cells    | Number <sup>1</sup><br>Grade <sup>2</sup> $\pm$ SEM<br>Significance <sup>3</sup> | 0 (9)<br>0                                              | 2 (9)<br>0.17 $\pm$ 0.12<br>ns                             | 2 (9)<br>0.17 $\pm$ 0.12                                 | 1 (9)<br>0.06 $\pm$ 0.06<br>ns                             |
|          | Inflammation                         | Number <sup>1</sup><br>Grade <sup>2</sup> $\pm$ SEM<br>Significance <sup>3</sup> | 6 (9)<br>0.39 $\pm$ 0.11                                | 7 (9)<br>0.61 $\pm$ 0.16<br>ns                             | 3 (9)<br>0.17 $\pm$ 0.08                                 | 6 (9)<br>0.33 $\pm$ 0.08<br>ns                             |
|          | Regenerative muscle fibers           | Number <sup>1</sup><br>No. <sup>4</sup> $\pm$ SEM<br>Significance <sup>3</sup>   | 1 (8)<br>0.13 $\pm$ 0.13                                | 3 (9)<br>0.78 $\pm$ 0.55<br>ns                             | 3 (9)<br>0.78 $\pm$ 0.40                                 | 6 (9)<br>6.33 $\pm$ 2.13<br><b>p &lt; 0.05</b>             |
|          | Nuclear condensation                 | Number <sup>1</sup><br>Grade <sup>2</sup> $\pm$ SEM<br>Significance <sup>3</sup> | 3 (9)<br>0.22 $\pm$ 0.12                                | 7 (9)<br>0.78 $\pm$ 0.22<br><b>p &lt; 0.05</b>             | 9 (9)<br>1.22 $\pm$ 0.21                                 | 7 (9)<br>1.22 $\pm$ 0.28                                   |
| Spleen   | Intramuscular adipose tissue         | Number <sup>1</sup><br>Grade <sup>2</sup> $\pm$ SEM<br>Significance <sup>3</sup> | 6 (9)<br>2.89 $\pm$ 1.11                                | 7 (9)<br>2.24 $\pm$ 1.15<br>ns                             | 5 (9)<br>2.82 $\pm$ 2.93                                 | 6 (9)<br>8.33 $\pm$ 2.92<br>ns                             |
|          | Lymphoid hyperplasia                 | Number <sup>1</sup><br>Grade <sup>2</sup> $\pm$ SEM<br>Significance <sup>3</sup> | 8 (9)<br>1.83 $\pm$ 0.26                                | 9 (9)<br>1.72 $\pm$ 0.12<br>ns                             | 9 (9)<br>1.67 $\pm$ 0.14                                 | 9 (9)<br>1.72 $\pm$ 0.17<br>ns                             |
|          | Extramedullary hematopoiesis         | Number <sup>1</sup><br>Grade <sup>2</sup> $\pm$ SEM<br>Significance <sup>3</sup> | 9 (9)<br>1.50 $\pm$ 0.24                                | 9 (9)<br>1.06 $\pm$ 0.16<br>ns                             | 9 (9)<br>1.11 $\pm$ 0.14                                 | 9 (9)<br>1.28 $\pm$ 0.22<br>ns                             |
|          | Dendritic reticular cell hyperplasia | Number <sup>1</sup><br>Grade <sup>2</sup> $\pm$ SEM<br>Significance <sup>3</sup> | 4 (9)<br>0.28 $\pm$ 0.12                                | 2 (9)<br>0.22 $\pm$ 0.15<br>ns                             | 4 (9)<br>0.22 $\pm$ 0.09                                 | 4 (9)<br>0.56 $\pm$ 0.28<br>ns                             |
| Skin     | Dermal inflammation                  | Number <sup>1</sup><br>Grade <sup>2</sup> $\pm$ SEM<br>Significance <sup>3</sup> | 9 (9)<br>0.89 $\pm$ 0.16                                | 8 (9)<br>0.44 $\pm$ 0.06<br><b>p &lt; 0.05</b>             | 9 (9)<br>0.39 $\pm$ 0.04                                 | 9 (9)<br>0.39 $\pm$ 0.04                                   |
| Bone     | Bone volume <sup>6</sup>             | Bone vol. / tissue vol. (%) $\pm$ SEM                                            | 0.56 $\pm$ 0.11 (n=5)                                   | 0.51 $\pm$ 0.27 ns (n=5)                                   | 3.94 $\pm$ 0.42 (n=5)                                    | 3.69 $\pm$ 1.14 ns (n=5)                                   |
|          | Trabecular number <sup>6</sup>       | Number (1/ $\mu$ m) $\pm$ SEM                                                    | 9.00x10 <sup>-5</sup> $\pm$ 1.48x10 <sup>-5</sup> (n=5) | 9.40x10 <sup>-5</sup> $\pm$ 5.14x10 <sup>-5</sup> ns (n=5) | 4.94 x10 <sup>-4</sup> $\pm$ 5.86x10 <sup>-5</sup> (n=5) | 5.66x10 <sup>-4</sup> $\pm$ 1.75x10 <sup>-4</sup> ns (n=5) |
|          | Trabecular thickness <sup>6</sup>    | Thickness ( $\mu$ m) $\pm$ SEM                                                   | 62.27 $\pm$ 3.97 (n=5)                                  | 54.63 $\pm$ 10.35 ns (n=5)                                 | 80.94 $\pm$ 4.58 (n=5)                                   | 65.50 $\pm$ 1.64 <b>p &lt; 0.05</b> (n=5)                  |
|          | Trabecular separation <sup>6</sup>   | Distance ( $\mu$ m) $\pm$ SEM                                                    | 697.55 $\pm$ 48.59 (n=5)                                | 777.81 $\pm$ 50.82 ns (n=5)                                | 469.05 $\pm$ 36.98 (n=5)                                 | 489.07 $\pm$ 42.27 ns (n=5)                                |
| Blood    | IGF-1 levels (plasma) <sup>9</sup>   | ng/ml $\pm$ SEM<br>Significance <sup>3</sup>                                     | 375.4 $\pm$ 17.8 (n=11)                                 | 321.5 $\pm$ 16.4 <b>p &lt; 0.05</b> (n=11)                 | 291.2 $\pm$ 21.9 (n=12)                                  | 238.6 $\pm$ 22.5 ns (n=10)                                 |

Mice were part of the ageing cohort and the age at analysis was 20 months for females and 22 months for males.

<sup>1</sup>Number of animals showing the pathology (out of the total number of animals analyzed).

<sup>2</sup>mean grade of the pathology as calculated from the total number of animals analyzed with 0 = absent, 1 = mild, 2 = moderate and 3 = severe.

<sup>3</sup>Statistical significance of difference found between wt and C/EBP $\beta^{\Delta uORF}$  mice from the same gender as calculated using the Student's t-test (ns = not significant).

<sup>4</sup>Mean number of regenerating muscle fibers found in five histological tissue slices per mouse. Note that a lower number is an indication for a more progressed ageing phenotype.

<sup>5</sup>mean surface area of intramuscular adipose tissue in percent of the total area of analyzed skeletal muscle tissue as calculated from the total number of animals analyzed.

<sup>6</sup>Trabecular bone parameters (percent bone volume/tissue volume; Trabecular number per mm; trabecular thickness and trabecular separation) measured by micro-CT analysis.

**Table supplement 4**

GO-term analysis of genes up-regulated in livers of old C/EBP $\beta^{\Delta\text{ORF}}$  mice

| GO term    | Description                                                | p-value               | FDR                  | Number of genes | Fold enrichment |
|------------|------------------------------------------------------------|-----------------------|----------------------|-----------------|-----------------|
| GO:0009897 | External side of plasma membrane                           | 4.4x10 <sup>-11</sup> | 5.2x10 <sup>-8</sup> | 16              | 10.1            |
| GO:0042102 | Positive regulation of T cell proliferation                | 2.5x10 <sup>-8</sup>  | 3.8x10 <sup>-5</sup> | 8               | 25.4            |
| GO:0016020 | Membrane                                                   | 3.9x10 <sup>-8</sup>  | 4.7x10 <sup>-5</sup> | 62              | 1.8             |
| GO:0031295 | T cell costimulation                                       | 1.2x10 <sup>-7</sup>  | 1.8x10 <sup>-4</sup> | 6               | 48.8            |
| GO:0001772 | Immunological synapse                                      | 6.5x10 <sup>-7</sup>  | 7.8x10 <sup>-4</sup> | 6               | 35.4            |
| GO:0006955 | Immune response                                            | 8.1x10 <sup>-7</sup>  | 1.2x10 <sup>-3</sup> | 11              | 8.2             |
| GO:0042113 | B cell activation                                          | 1.1x10 <sup>-5</sup>  | 1.7x10 <sup>-2</sup> | 5               | 35.0            |
| GO:0046641 | Positive regulation of alpha-beta T cell proliferation     | 1.8x10 <sup>-5</sup>  | 2.7x10 <sup>-2</sup> | 4               | 73,9            |
| GO:0045086 | Positive regulation of interleukine-2 biosynthetic process | 2.4x10 <sup>-5</sup>  | 3.5x10 <sup>-2</sup> | 4               | 67.7            |

Functional annotation of genes upregulated in livers of old C/EBP $\beta^{\Delta\text{ORF}}$  female mice compared to livers of old wt female mice (FDR < 0.01; 103 from 127 genes; 24 unknown IDs) using the DAVID database (Huang et al., 2009)

### Table supplement 5

GO-term analysis of genes down-regulated in livers of old C/EBP $\beta^{\Delta uORF}$  mice

| GO term    | Description          | p-value              | FDR q-value          | Number of genes | Fold enrichment |
|------------|----------------------|----------------------|----------------------|-----------------|-----------------|
| GO:0006953 | Acute phase response | $5.3 \times 10^{-6}$ | $6.2 \times 10^{-3}$ | 4               | 108.8           |
| GO:0005576 | Extracellular space  | $2.5 \times 10^{-5}$ | $2.4 \times 10^{-2}$ | 9               | 6.2             |

Functional annotation of genes downregulated in livers of old C/EBP $\beta^{\Delta uORF}$  female mice compared to livers of old wt female mice (FDR < 0.01; 23 from 25 genes, 2 unknown IDs) using the DAVID database (Huang et al., 2009)

**Table supplement 6**

GO-term analysis of genes showing high inter-individual variation between livers of old wt female mice

| GO term    | Description                              | p-value               | FDR q-value           | Number of genes | Fold enrichment |
|------------|------------------------------------------|-----------------------|-----------------------|-----------------|-----------------|
| GO:0005739 | Mitochondrion                            | $1.2 \times 10^{-30}$ | $1.8 \times 10^{-27}$ | 236             | 2.1             |
| GO:0070062 | Extracellular exosome                    | $3.4 \times 10^{-29}$ | $5.1 \times 10^{-26}$ | 315             | 1.8             |
| GO:0055114 | Oxidation-reduction process              | $4.4 \times 10^{-26}$ | $8.0 \times 10^{-23}$ | 124             | 2.8             |
| GO:0005743 | Mitochondrial inner membrane             | $2.5 \times 10^{-24}$ | $3.7 \times 10^{-21}$ | 86              | 3.5             |
| GO:0016491 | Oxidoreductase activity                  | $2.6 \times 10^{-24}$ | $4.2 \times 10^{-21}$ | 113             | 2.8             |
| GO:0005783 | Endoplasmic reticulum                    | $1.8 \times 10^{-17}$ | $2.6 \times 10^{-14}$ | 166             | 2.0             |
| GO:0008152 | Metabolic process                        | $1.7 \times 10^{-12}$ | $3.1 \times 10^{-9}$  | 74              | 2.4             |
| GO:0072562 | Blood microparticle                      | $5.0 \times 10^{-11}$ | $7.3 \times 10^{-8}$  | 33              | 3.9             |
| GO:0006953 | Acute phase response                     | $1.2 \times 10^{-10}$ | $2.3 \times 10^{-7}$  | 17              | 7.4             |
| GO:0005789 | Endoplasmic reticulum membrane           | $1.6 \times 10^{-10}$ | $2.4 \times 10^{-7}$  | 92              | 2.0             |
| GO:0006810 | Transport                                | $2.3 \times 10^{-10}$ | $4.2 \times 10^{-7}$  | 187             | 1.6             |
| GO:0043231 | Intracellular membrane-bounded organelle | $2.9 \times 10^{-10}$ | $4.3 \times 10^{-7}$  | 95              | 2.0             |
| GO:0007596 | Blood coagulation                        | $2.5 \times 10^{-9}$  | $4.5 \times 10^{-6}$  | 24              | 4.4             |

|            |                                                      |                      |                      |     |      |
|------------|------------------------------------------------------|----------------------|----------------------|-----|------|
| GO:0042730 | Fibrinolysis                                         | $3.0 \times 10^{-9}$ | $5.6 \times 10^{-6}$ | 11  | 11.2 |
| GO:0016020 | Membrane                                             | $4.5 \times 10^{-9}$ | $6.6 \times 10^{-6}$ | 546 | 1.2  |
| GO:0006635 | Fatty acid beta-oxidation                            | $5.9 \times 10^{-8}$ | $1.1 \times 10^{-4}$ | 16  | 5.6  |
| GO:0006631 | Fatty acid metabolic process                         | $8.0 \times 10^{-8}$ | $1.5 \times 10^{-4}$ | 31  | 3.0  |
| GO:0031090 | Organelle membrane                                   | $8.7 \times 10^{-8}$ | $1.3 \times 10^{-4}$ | 23  | 3.8  |
| GO:0006629 | Lipid metabolic process                              | $9.2 \times 10^{-8}$ | $1.7 \times 10^{-4}$ | 62  | 2.1  |
| GO:0007599 | Hemostasis                                           | $1.2 \times 10^{-7}$ | $2.1 \times 10^{-4}$ | 16  | 5.3  |
| GO:0005777 | Peroxisome                                           | $2.1 \times 10^{-7}$ | $3.1 \times 10^{-4}$ | 27  | 3.2  |
| GO:0006749 | Glutathione metabolic process                        | $3.0 \times 10^{-7}$ | $5.5 \times 10^{-4}$ | 16  | 5.0  |
| GO:0005829 | Cytosol                                              | $4.6 \times 10^{-7}$ | $6.7 \times 10^{-4}$ | 167 | 1.5  |
| GO:0005615 | Extracellular space                                  | $9.5 \times 10^{-7}$ | $1.4 \times 10^{-3}$ | 144 | 1.5  |
| GO:0034364 | High-density lipoprotein particle                    | $2.6 \times 10^{-6}$ | $3.8 \times 10^{-3}$ | 10  | 7.4  |
| GO:0005793 | Endoplasmic reticulum-Golgi intermediate compartment | $4.6 \times 10^{-6}$ | $6.7 \times 10^{-3}$ | 17  | 3.9  |
| GO:0004364 | Glutathione transferase activity                     | $4.8 \times 10^{-6}$ | $7.8 \times 10^{-3}$ | 12  | 5.5  |
| GO:0004129 | Cytochrome-c oxidase activity                        | $6.4 \times 10^{-6}$ | $1.1 \times 10^{-2}$ | 11  | 6.0  |
| GO:0003988 | Acetyl-CoA C-acetyltransferase activity              | $6.9 \times 10^{-6}$ | $1.1 \times 10^{-2}$ | 6   | 15.2 |

|            |                          |                      |                      |     |     |
|------------|--------------------------|----------------------|----------------------|-----|-----|
| GO:0006099 | Tricarboxylic acid cycle | $8.7 \times 10^{-6}$ | $1.6 \times 10^{-2}$ | 11  | 5.8 |
| GO:0020037 | Heme binding             | $1.1 \times 10^{-5}$ | $1.7 \times 10^{-2}$ | 29  | 2.5 |
| GO:0043022 | Ribosome binding         | $1.1 \times 10^{-5}$ | $1.8 \times 10^{-2}$ | 15  | 4.1 |
| GO:0016829 | Lyase activity           | $1.2 \times 10^{-5}$ | $2.0 \times 10^{-2}$ | 25  | 2.7 |
| GO:0005765 | Lysosomal membrane       | $1.7 \times 10^{-5}$ | $2.5 \times 10^{-2}$ | 34  | 2.3 |
| GO:0016787 | Hydrolase activity       | $2.2 \times 10^{-5}$ | $3.6 \times 10^{-2}$ | 142 | 1.4 |
| GO:0004497 | Monooxygenase activity   | $2.2 \times 10^{-5}$ | $3.6 \times 10^{-2}$ | 21  | 3.0 |

Functional annotation of genes showing a high inter-individual variation between livers from old wt female mice (Coefficient of variation of transcript levels of the corresponding gene in the livers of wt mice is at least twice as big as the coefficient of variation of the transcript levels of the same gene in the livers from C/EBP $\beta^{\Delta uORF}$  mice; 1386 from 1414 genes, 28 unknown IDs) using the DAVID database (Huang et al., 2009)

**Table supplement 7**

GO-term analysis of genes showing high inter-individual variation between livers of old C/EBP $\beta^{\Delta uORF}$  female mice

| GO term    | Description                  | p-value               | FDR q-value           | Number of genes | Fold enrichment |
|------------|------------------------------|-----------------------|-----------------------|-----------------|-----------------|
| GO:0005634 | Nucleus                      | $8.9 \times 10^{-45}$ | $1.3 \times 10^{-41}$ | 596             | 1.6             |
| GO:0005654 | Nucleoplasm                  | $7.1 \times 10^{-35}$ | $1.1 \times 10^{-31}$ | 258             | 2.2             |
| GO:0007049 | Cell cycle                   | $1.1 \times 10^{-26}$ | $2.0 \times 10^{-23}$ | 116             | 3.0             |
| GO:0005737 | Cytoplasm                    | $1.4 \times 10^{-25}$ | $2.1 \times 10^{-21}$ | 577             | 1.4             |
| GO:0003723 | Poly(A) RNA binding          | $1.8 \times 10^{-20}$ | $2.8 \times 10^{-17}$ | 155             | 2.2             |
| GO:0005515 | Protein binding              | $2.4 \times 10^{-16}$ | $3.6 \times 10^{-13}$ | 381             | 1.4             |
| GO:0006260 | DNA replication              | $6.1 \times 10^{-17}$ | $1.6 \times 10^{-13}$ | 37              | 6.1             |
| GO:0000166 | Nucleotide binding           | $1.2 \times 10^{-14}$ | $1.8 \times 10^{-11}$ | 210             | 1.7             |
| GO:0051301 | Cell division                | $2.6 \times 10^{-13}$ | $4.8 \times 10^{-10}$ | 65              | 2.7             |
| GO:0005524 | ATP binding                  | $2.6 \times 10^{-13}$ | $4.2 \times 10^{-10}$ | 170             | 1.7             |
| GO:0006351 | Transcription, DNA-templated | $1.6 \times 10^{-11}$ | $2.9 \times 10^{-8}$  | 192             | 1.6             |
| GO:0003677 | DNA binding                  | $3.6 \times 10^{-11}$ | $5.8 \times 10^{-8}$  | 190             | 1.6             |
| GO:0000278 | Mitotic nuclear division     | $5.1 \times 10^{-11}$ | $9.3 \times 10^{-8}$  | 50              | 2.8             |



|            |                                                     |                       |                      |     |     |
|------------|-----------------------------------------------------|-----------------------|----------------------|-----|-----|
| GO:0005730 | Nucleolus                                           | $6.0 \times 10^{-11}$ | $9.1 \times 10^{-8}$ | 102 | 2.0 |
| GO:0006974 | Cellular response to DNA damage stimulus            | $1.4 \times 10^{-10}$ | $2.5 \times 10^{-7}$ | 64  | 2.4 |
| GO:0003682 | Chromatin binding                                   | $1.2 \times 10^{-9}$  | $1.9 \times 10^{-6}$ | 67  | 2.2 |
| GO:0003723 | RNA binding                                         | $5.1 \times 10^{-9}$  | $8.1 \times 10^{-6}$ | 94  | 1.9 |
| GO:0006281 | DNA repair                                          | $6.4 \times 10^{-9}$  | $1.2 \times 10^{-5}$ | 50  | 2.5 |
| GO:0004386 | Helicase activity                                   | $1.0 \times 10^{-8}$  | $1.7 \times 10^{-5}$ | 29  | 3.5 |
| GO:0006355 | Regulation of transcription, DNA templated          | $2.7 \times 10^{-8}$  | $4.9 \times 10^{-5}$ | 208 | 1.4 |
| GO:0002376 | Immune system process                               | $1.6 \times 10^{-7}$  | $3.0 \times 10^{-4}$ | 53  | 2.2 |
| GO:0005643 | Nuclear pore                                        | $2.0 \times 10^{-7}$  | $3.0 \times 10^{-4}$ | 18  | 4.6 |
| GO:0005694 | Chromosome                                          | $2.2 \times 10^{-7}$  | $3.3 \times 10^{-4}$ | 48  | 2.3 |
| GO:0043234 | Protein complex                                     | $2.3 \times 10^{-7}$  | $3.4 \times 10^{-4}$ | 73  | 1.9 |
| GO:0045893 | Positive regulation of transcription, DNA templated | $2.4 \times 10^{-7}$  | $4.4 \times 10^{-4}$ | 70  | 1.9 |
| GO:0006397 | mRNA processing                                     | $4.8 \times 10^{-7}$  | $8.9 \times 10^{-4}$ | 46  | 2.3 |
| GO:0009615 | Response to virus                                   | $9.5 \times 10^{-7}$  | $1.7 \times 10^{-3}$ | 20  | 3.8 |
| GO:0042393 | Histone binding                                     | $1.1 \times 10^{-6}$  | $1.7 \times 10^{-3}$ | 25  | 3.1 |
| GO:0004402 | Histone acetyltransferase activity                  | $1.4 \times 10^{-6}$  | $2.2 \times 10^{-3}$ | 14  | 5.2 |

|            |                                                                      |                      |                      |     |      |
|------------|----------------------------------------------------------------------|----------------------|----------------------|-----|------|
| GO:0008380 | RNA splicing                                                         | $1.4 \times 10^{-6}$ | $2.5 \times 10^{-3}$ | 37  | 2.4  |
| GO:0003725 | Double-stranded RNA binding                                          | $1.5 \times 10^{-6}$ | $2.5 \times 10^{-3}$ | 18  | 4.0  |
| GO:0005681 | Spliceosomal complex                                                 | $2.6 \times 10^{-6}$ | $3.9 \times 10^{-3}$ | 25  | 3.0  |
| GO:0008283 | Cell proliferation                                                   | $3.4 \times 10^{-6}$ | $6.3 \times 10^{-3}$ | 34  | 2.4  |
| GO:0042555 | MCM complex                                                          | $3.8 \times 10^{-6}$ | $5.7 \times 10^{-3}$ | 7   | 12.6 |
| GO:0005856 | Cytoskeleton                                                         | $3.9 \times 10^{-6}$ | $5.9 \times 10^{-3}$ | 107 | 1.6  |
| GO:0016569 | Covalent chromatin modification                                      | $5.5 \times 10^{-6}$ | $1.0 \times 10^{-2}$ | 38  | 2.3  |
| GO:0030529 | Intracellular ribonucleoprotein complex                              | $6.6 \times 10^{-6}$ | $1.0 \times 10^{-2}$ | 42  | 2.1  |
| GO:0000122 | Negative regulation of transcription from RNA polymerase II promoter | $6.7 \times 10^{-6}$ | $1.2 \times 10^{-2}$ | 78  | 1.7  |
| GO:0051028 | mRNA transport                                                       | $8.3 \times 10^{-6}$ | $1.5 \times 10^{-2}$ | 19  | 3.4  |
| GO:0000281 | Mitotic cytokinesis                                                  | $9.4 \times 10^{-6}$ | $1.7 \times 10^{-2}$ | 11  | 5.8  |
| GO:0005813 | Centrosome                                                           | $1.5 \times 10^{-5}$ | $2.2 \times 10^{-2}$ | 51  | 1.9  |
| GO:0000775 | Chromosome, centromeric region                                       | $1.6 \times 10^{-5}$ | $2.4 \times 10^{-2}$ | 24  | 2.8  |
| GO:0005829 | Cytosol                                                              | $1.8 \times 10^{-5}$ | $2.7 \times 10^{-2}$ | 153 | 1.4  |
| GO:0043967 | Histone H4 acetylation                                               | $1.8 \times 10^{-5}$ | $3.3 \times 10^{-2}$ | 11  | 5.4  |
| GO:0003697 | Single-stranded DNA binding                                          | $1.8 \times 10^{-5}$ | $2.9 \times 10^{-2}$ | 18  | 3.4  |

|            |                                      |                      |                      |    |     |
|------------|--------------------------------------|----------------------|----------------------|----|-----|
| GO:0016607 | Nuclear speck                        | $2.3 \times 10^{-5}$ | $3.5 \times 10^{-2}$ | 30 | 2.4 |
| GO:0005874 | Microtubule                          | $2.5 \times 10^{-5}$ | $3.8 \times 10^{-2}$ | 41 | 2.0 |
| GO:0000784 | Nuclear chromosome, telomeric region | $3.0 \times 10^{-5}$ | $4.5 \times 10^{-2}$ | 22 | 2.8 |

Functional annotation of genes showing a high inter-individual variation between livers from old wt female mice (Coefficient of variation of transcript levels of the corresponding gene in the livers of C/EBP $\beta^{\Delta uORF}$  mice is at least twice as big as the coefficient of variation of the transcript levels of the same gene in the livers from wt mice; 1354 from 1375 genes, 21 unknown IDs) using the DAVID database (Huang et al., 2009)
